# Supplementary material for: Spirometric reference equations for Cameroonians aged 4 to 89 years derived using lambda, mu, sigma (LMS) method
Source: BMC Pulm Med. 2021 Nov 3;21:344. doi: 10.1186/s12890-021-01705-1 (PMC8565080; doi:10.1186/s12890-021-01705-1)
Supplement: Supplementary file 3 — Additional file 3. Lookup tables for splines and coefficients to derive normal spirometric values for Cameroonian aged 4 to 89 years old. [file 12890_2021_1705_MOESM3_ESM.xlsx]

## Sheet: FEV1_males
Lookup tables
	age	Mspline	Sspline	Lspline		Coefficients to be used with lookup tables for Mspline, Sspline and Lspline (4-88 years)
	4	-0.181285350984037	0.0337998813955789	1.55431223447522e-15		Coefficients
	4.25	-0.183536280602949	0.0316440767453203	1.33226762955019e-15		Intercept	a0 -9.46728	p0 -2.24922	q0 -3.5023
	4.5	-0.185658513498225	0.0296115300561106	1.77635683940025e-15		Height	a1 2.02753	/	/
	4.75	-0.187665973604746	0.0276889058227758	1.33226762955019e-15		Age	a2 0.04519	p1 0.13442	q1 1.3608
	5	-0.189568587147756	0.0258649203484418	1.33226762955019e-15		Splines	Mspline	Sspline	Lspline
	5.25	-0.19119204662651	0.0241297596226295	1.33226762955019e-15
	5.5	-0.192327337001206	0.0224748909215626	1.33226762955019e-15
	5.75	-0.192872419531614	0.0208929779209834	1.33226762955019e-15		L = q0 + q1*ln(Age) + Lspline
	6	-0.192755188100346	0.0193774962932058	1.33226762955019e-15		M = exp(a0 + a1*ln(Height) + a2*ln(Age) + Mspline)
	6.25	-0.191927296848341	0.0179226875749585	1.33226762955019e-15		S = exp(p0 + p1*ln(Age) + Sspline)
	6.5	-0.190359004455447	0.016523510257856	1.33226762955019e-15		LLN (5th percentile) = exp(ln(1 - 1.645*L*S)/L +ln(M))
	6.75	-0.188073176961412	0.0151759350672676	1.33226762955019e-15
	7	-0.185171442973283	0.0138771633486947	1.33226762955019e-15		Age in years with > 1 decimals
	7.25	-0.181749989032845	0.0126246932774707	1.33226762955019e-15		Height in cm, with one decimal
	7.5	-0.177890681013528	0.011416187689776	1.33226762955019e-15
	7.75	-0.173655907914524	0.0102502514668121	1.33226762955019e-15		For 4-88 years:
	8	-0.169081431856647	0.00912736517159085	1.33226762955019e-15		Linearly interpolate Mspline , Sspline and Lspline for appropriate age (e.g. 4.3 yr) from look-up tables
	8.25	-0.164196447138456	0.00804795066061059	1.33226762955019e-15
	8.5	-0.159027221709092	0.00701211698972504	1.33226762955019e-15
	8.75	-0.153597212883588	0.00601972745694823	1.33226762955019e-15
	9	-0.147921154471526	0.00507050034677681	1.33226762955019e-15
	9.25	-0.142005939130142	0.00416404626141098	1.33226762955019e-15
	9.5	-0.135858354909677	0.0032998436972731	1.33226762955019e-15
	9.75	-0.129485381557355	0.00247726580652485	8.88178419700125e-16
	10	-0.122894100322087	0.00169560477794817	1.33226762955019e-15
	10.25	-0.116086139909696	0.000954088614513404	1.33226762955019e-15
	10.5	-0.109043956623958	0.000251889672642225	8.88178419700125e-16
	10.75	-0.101748821505618	-0.000411852167385041	1.33226762955019e-15
	11	-0.0941855303555545	-0.00103801616993504	1.33226762955019e-15
	11.25	-0.0863418956865427	-0.00162749232190196	8.88178419700125e-16
	11.5	-0.0782083227090489	-0.00218117459437295	8.88178419700125e-16
	11.75	-0.0697797718774815	-0.00269999030993184	1.33226762955019e-15
	12	-0.0610748604920897	-0.00318518634274034	1.33226762955019e-15
	12.25	-0.0521227884518556	-0.00363813393556045	8.88178419700125e-16
	12.5	-0.0429502360836018	-0.00406013326815802	1.33226762955019e-15
	12.75	-0.0335814854366259	-0.00445241607943481	1.33226762955019e-15
	13	-0.0240386595442619	-0.00481615014483583	1.33226762955019e-15
	13.25	-0.0143419346200346	-0.0051524434095942	8.88178419700125e-16
	13.5	-0.00451051379372913	-0.00546235355240765	8.88178419700125e-16
	13.75	0.00541294318785823	-0.00574706904248568	1.33226762955019e-15
	14	0.0153605804771235	-0.0060079240389439	8.88178419700125e-16
	14.25	0.0252697481015947	-0.00624617798327654	8.88178419700125e-16
	14.5	0.0350841913913005	-0.00646300882466067	1.33226762955019e-15
	14.75	0.0447534211604221	-0.00665951944486909	1.33226762955019e-15
	15	0.0542321513591872	-0.00683674348354213	1.33226762955019e-15
	15.25	0.0634797961617277	-0.00699565062877316	1.33226762955019e-15
	15.5	0.0724600191371323	-0.00713715141695204	1.33226762955019e-15
	15.75	0.0811415086261746	-0.00726213756818339	8.88178419700125e-16
	16	0.0895010535123841	-0.00737159080777539	1.33226762955019e-15
	16.25	0.0975192511525087	-0.00746646562602993	8.88178419700125e-16
	16.5	0.105178962485663	-0.007547654481316	1.33226762955019e-15
	16.75	0.112465100305164	-0.00761599248059253	8.88178419700125e-16
	17	0.119364437934275	-0.0076722616410978	8.88178419700125e-16
	17.25	0.125865436486	-0.00771719478650712	8.88178419700125e-16
	17.5	0.131958089259776	-0.00775147911319296	8.88178419700125e-16
	17.75	0.137633782187166	-0.00777575945906439	1.33226762955019e-15
	18	0.14288518879037	-0.00779064131791585	8.88178419700125e-16
	18.25	0.147714502914207	-0.00779669962269836	8.88178419700125e-16
	18.5	0.152141280379452	-0.00779448701674812	1.33226762955019e-15
	18.75	0.156186134987935	-0.00778452447699474	8.88178419700125e-16
	19	0.159868562733122	-0.00776730195198549	8.88178419700125e-16
	19.25	0.163206969863165	-0.00774328041910177	8.88178419700125e-16
	19.5	0.166218760813242	-0.00771289382774887	8.88178419700125e-16
	19.75	0.168920399316949	-0.00767655087969632	1.77635683940025e-15
	20	0.17132746768341	-0.00763463667717179	8.88178419700125e-16
	20.25	0.17345472162766	-0.00758751424771087	1.77635683940025e-15
	20.5	0.175316141143806	-0.00753552595657725	8.88178419700125e-16
	20.75	0.176924977934446	-0.00747899482117509	1.77635683940025e-15
	21	0.178293710306598	-0.00741822334252151	1.77635683940025e-15
	21.25	0.179433733733257	-0.00735348525616475	8.88178419700125e-16
	21.5	0.180355733209355	-0.00728503552992077	8.88178419700125e-16
	21.75	0.181069867870493	-0.00721311533224123	1.77635683940025e-15
	22	0.181585800961379	-0.00713795285709651	8.88178419700125e-16
	22.25	0.181912727921379	-0.00705976409511422	8.88178419700125e-16
	22.5	0.182059402628028	-0.00697875355291	8.88178419700125e-16
	22.75	0.18203416193276	-0.00689511492395312	1.77635683940025e-15
	23	0.181844948618245	-0.00680903171505842	8.88178419700125e-16
	23.25	0.181499332891455	-0.00672067783149854	8.88178419700125e-16
	23.5	0.181004532522506	-0.00663021812446263	1.77635683940025e-15
	23.75	0.1803674317205	-0.00653780890231026	8.88178419700125e-16
	24	0.179594598843673	-0.00644359841019626	8.88178419700125e-16
	24.25	0.178692363565405	-0.0063477237347811	8.88178419700125e-16
	24.5	0.177667171931313	-0.0062502913555329	8.88178419700125e-16
	24.75	0.176525337975832	-0.00615139293695988	8.88178419700125e-16
	25	0.175272884833884	-0.00605111580628015	8.88178419700125e-16
	25.25	0.17391555927332	-0.00594954321003804	8.88178419700125e-16
	25.5	0.17245884588996	-0.00584675452464301	8.88178419700125e-16
	25.75	0.170907980467906	-0.00574282545447602	1.77635683940025e-15
	26	0.169267962562872	-0.0056378282187004	8.88178419700125e-16
	26.25	0.167543567355921	-0.00553183172682914	1.77635683940025e-15
	26.5	0.165739356828928	-0.00542490174431554	8.88178419700125e-16
	26.75	0.163859690313789	-0.00531710105043937	8.88178419700125e-16
	27	0.16190873442258	-0.00520848958269693	8.88178419700125e-16
	27.25	0.159890472452059	-0.00509912457854744	8.88178419700125e-16
	27.5	0.157808713251113	-0.00498906070658856	8.88178419700125e-16
	27.75	0.155667099610165	-0.00487835018997651	8.88178419700125e-16
	28	0.153469098181629	-0.00476704265342698	8.88178419700125e-16
	28.25	0.151217828175064	-0.00465518253993147	1.77635683940025e-15
	28.5	0.148916154233993	-0.00454281050998295	8.88178419700125e-16
	28.75	0.146566819448697	-0.00442996544048757	1.77635683940025e-15
	29	0.144172452805702	-0.00431668453870282	8.88178419700125e-16
	29.25	0.141735574376558	-0.00420300341689428	1.77635683940025e-15
	29.5	0.139258600253861	-0.00408895616610105	1.77635683940025e-15
	29.75	0.136743847224633	-0.0039745754246896	8.88178419700125e-16
	30	0.134193537211086	-0.00385989244412621	8.88178419700125e-16
	30.25	0.131609801482821	-0.00374493715109891	8.88178419700125e-16
	30.5	0.128994684659158	-0.00362973820669854	8.88178419700125e-16
	30.75	0.12635014850912	-0.0035143230622976	8.88178419700125e-16
	31	0.123678075564545	-0.00339871801301483	8.88178419700125e-16
	31.25	0.12098027255573	-0.00328294824836139	8.88178419700125e-16
	31.5	0.118258473676256	-0.00316703790036654	1.77635683940025e-15
	31.75	0.115514343690695	-0.00305101008933151	8.88178419700125e-16
	32	0.112749480893916	-0.00293488696774102	8.88178419700125e-16
	32.25	0.109965421305731	-0.00281868976260591	8.88178419700125e-16
	32.5	0.10716357207297	-0.00270243874767595	8.88178419700125e-16
	32.75	0.104345132540967	-0.0025861531998228	8.88178419700125e-16
	33	0.101511224161639	-0.00246985156158552	8.88178419700125e-16
	33.25	0.098662927015905	-0.00235355150777794	8.88178419700125e-16
	33.5	0.0958012800426093	-0.0022372699766664	8.88178419700125e-16
	33.75	0.0929272827032932	-0.00212102320051533	1.77635683940025e-15
	34	0.0900418965671292	-0.0020048267348467	8.88178419700125e-16
	34.25	0.0871460468229994	-0.00188869548606352	8.88178419700125e-16
	34.5	0.0842406237268509	-0.00177264373832609	8.88178419700125e-16
	34.75	0.0813264839819325	-0.00165668517880357	8.88178419700125e-16
	35	0.078404452060191	-0.00154083292223484	1.77635683940025e-15
	35.25	0.0754753214598942	-0.00142509953334335	8.88178419700125e-16
	35.5	0.0725398559140551	-0.0013094970494667	8.88178419700125e-16
	35.75	0.0695987905502715	-0.00119403700254983	8.88178419700125e-16
	36	0.0666528329814433	-0.00107873043743245	8.88178419700125e-16
	36.25	0.063702664373178	-0.000963587932873988	8.88178419700125e-16
	36.5	0.0607489404495993	-0.000848619619332691	8.88178419700125e-16
	36.75	0.0577922924621301	-0.000733835196757848	8.88178419700125e-16
	37	0.0548333281148832	-0.000619243951329507	8.88178419700125e-16
	37.25	0.0518726324597374	-0.000504854772443775	8.88178419700125e-16
	37.5	0.0489107710106769	-0.000390676302960635	8.88178419700125e-16
	37.75	0.0459483028245202	-0.000276717685876893	8.88178419700125e-16
	38	0.0429857718177189	-0.000162988014160037	8.88178419700125e-16
	38.25	0.0400237015947322	-4.94959906442993e-05	8.88178419700125e-16
	38.5	0.0370625961825244	6.37500574491856e-05	8.88178419700125e-16
	38.75	0.0341029407559841	0.000176742163900512	8.88178419700125e-16
	39	0.0311452023200243	0.00028947271050983	8.88178419700125e-16
	39.25	0.0281898303833596	0.000401934413036376	8.88178419700125e-16
	39.5	0.0252372575842319	0.000514120309160315	8.88178419700125e-16
	39.75	0.0222879003103333	0.000626023745849302	1.77635683940025e-15
	40	0.019342159281674	0.000737638367888982	8.88178419700125e-16
	40.25	0.016400420116284	0.000848958106334008	8.88178419700125e-16
	40.5	0.0134630538679303	0.000959977168507375	1.77635683940025e-15
	40.75	0.0105304175503012	0.00107069002679072	8.88178419700125e-16
	41	0.00760285463305266	0.00118109140951805	8.88178419700125e-16
	41.25	0.00468069552565353	0.00129117629076636	8.88178419700125e-16
	41.5	0.00176425803660152	0.001400939881677	8.88178419700125e-16
	41.75	-0.00114615218112846	0.00151037762140982	8.88178419700125e-16
	42	-0.0040502412043768	0.00161948516890686	8.88178419700125e-16
	42.25	-0.00694772642833286	0.00172825839453128	8.88178419700125e-16
	42.5	-0.00983833616996677	0.00183669337251158	8.88178419700125e-16
	42.75	-0.0127218091855088	0.00194478637363105	8.88178419700125e-16
	43	-0.0155978956370664	0.00205253385530102	8.88178419700125e-16
	43.25	-0.0184663566490055	0.00215993245519663	8.88178419700125e-16
	43.5	-0.0213272447085213	0.00226697847257351	8.88178419700125e-16
	43.75	-0.0241810185436755	0.00237366765177316	8.88178419700125e-16
	44	-0.0270281566102035	0.00247999588022529	8.88178419700125e-16
	44.25	-0.0298691223042766	0.00258595924551352	8.88178419700125e-16
	44.5	-0.0327043643188052	0.00269155402824484	8.88178419700125e-16
	44.75	-0.0355343171385147	0.0027967766949526	8.88178419700125e-16
	45	-0.0383594015032767	0.00290162389232362	8.88178419700125e-16
	45.25	-0.0411800248427596	0.00300609243980476	8.88178419700125e-16
	45.5	-0.0439965817013519	0.00311017932406044	8.88178419700125e-16
	45.75	-0.0468094541467696	0.00321388169306669	8.88178419700125e-16
	46	-0.0496190121613882	0.00331719685006471	8.88178419700125e-16
	46.25	-0.0524256140234929	0.00342012224830524	8.88178419700125e-16
	46.5	-0.0552296066752831	0.00352265548587383	8.88178419700125e-16
	46.75	-0.0580313260763106	0.00362479430053519	8.88178419700125e-16
	47	-0.0608310975438382	0.00372653656443411	8.88178419700125e-16
	47.25	-0.0636292360863244	0.00382788028000136	8.88178419700125e-16
	47.5	-0.0664260467162752	0.00392882357462376	8.88178419700125e-16
	47.75	-0.0692218247779905	0.00402936469792214	8.88178419700125e-16
	48	-0.0720168562050407	0.00412950201412321	8.88178419700125e-16
	48.25	-0.0748114178599479	0.00422923400222541	8.88178419700125e-16
	48.5	-0.0776057777694437	0.00432855924866971	8.88178419700125e-16
	48.75	-0.0804001954180276	0.00442747644533847	8.88178419700125e-16
	49	-0.0831949219970785	0.00452598438509844	8.88178419700125e-16
	49.25	-0.085990200659408	0.00462408195848352	8.88178419700125e-16
	49.5	-0.0887862667629449	0.00472176815007708	8.88178419700125e-16
	49.75	-0.0915833481029349	0.00481904203727601	8.88178419700125e-16
	50	-0.0943816651469298	0.00491590278118181	8.88178419700125e-16
	50.25	-0.0971814304984804	0.00501235005829948	8.88178419700125e-16
	50.5	-0.0999828479818756	0.00510838470141439	8.88178419700125e-16
	50.75	-0.102786114506952	0.00520400774936691	8.88178419700125e-16
	51	-0.105591420568091	0.00529922026839236	8.88178419700125e-16
	51.25	-0.108398950444654	0.00539402335189765	8.88178419700125e-16
	51.5	-0.111208882378405	0.00548841811826595	8.88178419700125e-16
	51.75	-0.114021388754223	0.00558240570945401	8.88178419700125e-16
	52	-0.11683663627254	0.0056759872906853	8.88178419700125e-16
	52.25	-0.119654786118467	0.00576916404869876	8.88178419700125e-16
	52.5	-0.12247599411929	0.00586193719051686	8.88178419700125e-16
	52.75	-0.12530041090784	0.00595430794310525	8.88178419700125e-16
	53	-0.128128182071347	0.00604627755207288	8.88178419700125e-16
	53.25	-0.130959448295677	0.00613784728014855	8.88178419700125e-16
	53.5	-0.13379434551417	0.00622901840713141	8.88178419700125e-16
	53.75	-0.136633005040949	0.00631979222827961	8.88178419700125e-16
	54	-0.139475553708198	0.00641017005407241	8.88178419700125e-16
	54.25	-0.142322113995053	0.00650015320910313	8.88178419700125e-16
	54.5	-0.145172804152287	0.00658974303096516	8.88178419700125e-16
	54.75	-0.148027738324119	0.00667894086979404	8.88178419700125e-16
	55	-0.150887026668808	0.00676774808759029	8.88178419700125e-16
	55.25	-0.153750775473744	0.00685616605763206	8.88178419700125e-16
	55.5	-0.156619087264604	0.00694419616346753	8.88178419700125e-16
	55.75	-0.15949206091072	0.007031839798054	8.88178419700125e-16
	56	-0.162369791737657	0.00711909836398217	8.88178419700125e-16
	56.25	-0.165252371620252	0.00720597327182348	8.88178419700125e-16
	56.5	-0.168139889046545	0.0072924659404825	8.88178419700125e-16
	56.75	-0.171032429220727	0.00737857779610485	8.88178419700125e-16
	57	-0.173930074520211	0.00746431027055672	8.88178419700125e-16
	57.25	-0.176832904207393	0.00754966480208141	8.88178419700125e-16
	57.5	-0.179740995408071	0.00763464283180038	8.88178419700125e-16
	57.75	-0.182654435454127	0.00771924576209448	8.88178419700125e-16
	58	-0.185573235685071	0.00780347524571257	8.88178419700125e-16
	58.25	-0.18849736470909	0.00788733307383094	8.88178419700125e-16
	58.5	-0.191426661485496	0.00797082146764216	8.88178419700125e-16
	58.75	-0.194360967084194	0.00805394263601156	8.88178419700125e-16
	59	-0.197300130375185	0.00813669875626011	8.88178419700125e-16
	59.25	-0.200244003207347	0.00821909199033755	8.88178419700125e-16
	59.5	-0.203192440343862	0.00830112448457454	8.88178419700125e-16
	59.75	-0.206145299398395	0.00838279836994071	8.88178419700125e-16
	60	-0.209102440774487	0.00846411576228889	8.88178419700125e-16
	60.25	-0.212063727604701	0.00854507876232513	8.88178419700125e-16
	60.5	-0.215029025689669	0.00862568945512154	8.88178419700125e-16
	60.75	-0.217998203445029	0.00870594991107398	8.88178419700125e-16
	61	-0.220971131844461	0.00878586218572841	8.88178419700125e-16
	61.25	-0.223947684364289	0.00886542831966164	8.88178419700125e-16
	61.5	-0.226927736930481	0.00894465033855063	8.88178419700125e-16
	61.75	-0.229911167868741	0.0090235302535806	8.88178419700125e-16
	62	-0.232897857851171	0.00910207006108887	8.88178419700125e-16
	62.25	-0.235887689848344	0.00918027174298119	8.88178419700125e-16
	62.5	-0.238880549082367	0.00925813726679636	8.88178419700125e-16
	62.75	-0.241876322979937	0.00933566858574841	8.88178419700125e-16
	63	-0.244874901122698	0.00941286763866489	8.88178419700125e-16
	63.25	-0.247876175206741	0.00948973635026151	8.88178419700125e-16
	63.5	-0.250880038998181	0.00956627663132559	8.88178419700125e-16
	63.75	-0.253886388290358	0.00964249037878684	8.88178419700125e-16
	64	-0.256895120860525	0.00971837947551935	8.88178419700125e-16
	64.25	-0.259906136425528	0.00979394578980797	8.88178419700125e-16
	64.5	-0.262919336615044	0.00986919117774354	8.88178419700125e-16
	64.75	-0.265934624922552	0.00994411748140855	8.88178419700125e-16
	65	-0.268951906667395	0.010018726528771	0
	65.25	-0.27197108895977	0.0100930201344116	8.88178419700125e-16
	65.5	-0.274992080589975	0.0101670001009095	8.88178419700125e-16
	65.75	-0.278014792193757	0.0102406682165475	8.88178419700125e-16
	66	-0.281039136210387	0.0103140262549253	8.88178419700125e-16
	66.25	-0.284065026565965	0.0103870759781546	8.88178419700125e-16
	66.5	-0.287092377211637	0.0104598191502343	8.88178419700125e-16
	66.75	-0.290121111226119	0.0105322574528002	8.88178419700125e-16
	67	-0.293151140185547	0.0106043926753008	8.88178419700125e-16
	67.25	-0.29618234670937	0.010676226875874	8.88178419700125e-16
	67.5	-0.299214549058949	0.0107477627074262	8.88178419700125e-16
	67.75	-0.302247550182763	0.0108190029653867	8.88178419700125e-16
	68	-0.305281160924018	0.0108899503732964	8.88178419700125e-16
	68.25	-0.30831519581043	0.0109606076214619	8.88178419700125e-16
	68.5	-0.311349472760538	0.0110309773694726	8.88178419700125e-16
	68.75	-0.31438381372474	0.0111010622400325	8.88178419700125e-16
	69	-0.31741804438	0.0111708648217252	8.88178419700125e-16
	69.25	-0.320451994025552	0.0112403876699376	8.88178419700125e-16
	69.5	-0.323485495492514	0.011309633307073	8.88178419700125e-16
	69.75	-0.326518385106041	0.0113786042236272	8.88178419700125e-16
	70	-0.329550502603992	0.0114473028789241	8.88178419700125e-16
	70.25	-0.332581691064401	0.0115157317010313	8.88178419700125e-16
	70.5	-0.335611796818769	0.0115838930842842	8.88178419700125e-16
	70.75	-0.338640669427626	0.0116517893963743	8.88178419700125e-16
	71	-0.341668161586446	0.0117194229743018	8.88178419700125e-16
	71.25	-0.344694129063406	0.0117867961251172	8.88178419700125e-16
	71.5	-0.347718430645232	0.0118539111276248	8.88178419700125e-16
	71.75	-0.350740928073163	0.0119207702322246	8.88178419700125e-16
	72	-0.353761485983668	0.0119873756614277	8.88178419700125e-16
	72.25	-0.356779971849658	0.0120537296101528	8.88178419700125e-16
	72.5	-0.35979625592395	0.0121198342460598	8.88178419700125e-16
	72.75	-0.362810211188417	0.0121856917113432	8.88178419700125e-16
	73	-0.365821713292528	0.0122513041217296	8.88178419700125e-16
	73.25	-0.368830640500157	0.0123166735660505	8.88178419700125e-16
	73.5	-0.371836873643113	0.0123818021079998	8.88178419700125e-16
	73.75	-0.374840296069346	0.0124466917869888	8.88178419700125e-16
	74	-0.377840793590037	0.0125113446177767	8.88178419700125e-16
	74.25	-0.380838254432735	0.0125757625909195	8.88178419700125e-16
	74.5	-0.383832569195018	0.0126399476731029	8.88178419700125e-16
	74.75	-0.386823630794824	0.0127039018073574	8.88178419700125e-16
	75	-0.389811334425525	0.0127676269135462	0
	75.25	-0.392795577512311	0.0128311248887807	8.88178419700125e-16
	75.5	-0.395776259674424	0.0128943976083544	8.88178419700125e-16
	75.75	-0.398753282670961	0.0129574469249027	8.88178419700125e-16
	76	-0.401726550347055	0.0130202746693824	8.88178419700125e-16
	76.25	-0.404695968472948	0.0130828826506093	8.88178419700125e-16
	76.5	-0.407661444242455	0.0131452726543866	8.88178419700125e-16
	76.75	-0.410622888674066	0.0132074464527627	8.88178419700125e-16
	77	-0.413580214952672	0.0132694057981293	8.88178419700125e-16
	77.25	-0.416533338079409	0.0133311524223534	8.88178419700125e-16
	77.5	-0.419482171309408	0.0133926880232063	8.88178419700125e-16
	77.75	-0.422426624415495	0.0134540142579695	8.88178419700125e-16
	78	-0.425366608679189	0.0135151327634915	8.88178419700125e-16
	78.25	-0.428302036291086	0.013576045154998	8.88178419700125e-16
	78.5	-0.43123281524587	0.0136367530039792	8.88178419700125e-16
	78.75	-0.434158859272713	0.0136972578673569	8.88178419700125e-16
	79	-0.437080081756102	0.0137575612924647	8.88178419700125e-16
	79.25	-0.439996396985372	0.0138176648109103	8.88178419700125e-16
	79.5	-0.442907721111029	0.0138775699374853	8.88178419700125e-16
	79.75	-0.445813972109539	0.0139372781704046	8.88178419700125e-16
	80	-0.448715069748761	0.0139967909915379	8.88178419700125e-16
	80.25	-0.4516109355541	0.0140561098666416	8.88178419700125e-16
	80.5	-0.454501493968991	0.01411523624322	8.88178419700125e-16
	80.75	-0.457386680676667	0.0141741715342194	8.88178419700125e-16
	81	-0.460266437418902	0.0142329171284321	8.88178419700125e-16
	81.25	-0.463140705305682	0.014291474403904	8.88178419700125e-16
	81.5	-0.466009392246836	0.0143498447927526	8.88178419700125e-16
	81.75	-0.468872379066521	0.0144080297691727	0
	82	-0.471729548369929	0.0144660307922639	8.88178419700125e-16
	82.25	-0.474580831302994	0.0145238492132831	8.88178419700125e-16
	82.5	-0.477426262225753	0.0145814861671736	8.88178419700125e-16
	82.75	-0.480265888752957	0.0146389427514133	8.88178419700125e-16
	83	-0.483099757932797	0.0146962200536089	8.88178419700125e-16
	83.25	-0.485927916254923	0.0147533191516143	8.88178419700125e-16
	83.5	-0.488750373408218	0.0148102411856632	8.88178419700125e-16
	83.75	-0.491567004286985	0.0148669875531804	8.88178419700125e-16
	84	-0.494377654925417	0.0149235596984536	8.88178419700125e-16
	84.25	-0.497182174386309	0.01497995904941	0
	84.5	-0.499980414707283	0.0150361870178475	8.88178419700125e-16
	84.75	-0.50277223084808	0.0150922449996613	8.88178419700125e-16
	85	-0.505557480638837	0.0151481343750692	8.88178419700125e-16
	85.25	-0.508336024729356	0.0152038565088302	8.88178419700125e-16
	85.5	-0.511107726539354	0.0152594127504615	8.88178419700125e-16
	85.75	-0.513872452209643	0.0153148044344507	8.88178419700125e-16
	86	-0.51663007055425	0.0153700328804658	8.88178419700125e-16
	86.25	-0.519380453013447	0.0154250993935594	8.88178419700125e-16
	86.5	-0.522123473607655	0.0154800052643724	8.88178419700125e-16
	86.75	-0.52485900889223	0.0155347517693316	8.88178419700125e-16
	87	-0.527586937913105	0.015589340170846	8.88178419700125e-16
	87.25	-0.530307143431171	0.0156437717148306	8.88178419700125e-16
	87.5	-0.533019572747897	0.0156980475028055	8.88178419700125e-16
	87.75	-0.535724263311407	0.0157521684381077	8.88178419700125e-16
	88	-0.538421259154525	0.015806135401836	8.88178419700125e-16

## Sheet: FVC_males
	Lookup tables
	age	Mspline	Sspline	Lspline			Coefficients to be used with lookup tables for Mspline, Sspline and Lspline (4-88 years)
	4	-0.175666200626909	0.000215666103920098	-4.44089209850063e-16			Coefficients
	4.25	-0.175449964989479	0.000201358938708873	-2.22044604925031e-16			Intercept	a0 -10.08957	p0 -2.12513	q0 -2.5916
	4.5	-0.175246092607583	0.000187869784541661	-4.44089209850063e-16			Height	a1 2.14886	/	/
	4.75	-0.175053245877903	0.000175110139300827	-4.44089209850063e-16			Age	a2 0.09095	p1 0.10416	q1 1.0050
	5	-0.174869283262456	0.000163005150125795	-4.44089209850063e-16			Splines	Mspline	Sspline	Lspline
	5.25	-0.174595181565588	0.000151492981835366	-4.44089209850063e-16
	5.5	-0.174122221415303	0.000140521185495457	-4.44089209850063e-16
	5.75	-0.173401146837151	0.000130043431885163	-4.44089209850063e-16			L = q0 + q1*ln(Age) + Lspline
	6	-0.172409713537828	0.000120019042056052	-4.44089209850063e-16			M = exp(a0 + a1*ln(Height) + a2*ln(Age) + Mspline)
	6.25	-0.171139990602057	0.000110412120067904	-4.44089209850063e-16			S = exp(p0 + p1*ln(Age) + Sspline)
	6.5	-0.169589010765307	0.000101190866824252	-4.44089209850063e-16			LLN (5th percentile) = exp(ln(1 - 1.645*L*S)/L +ln(M))
	6.75	-0.167739272894247	9.23295863923812e-05	-4.44089209850063e-16
	7	-0.165544101927717	8.38101900084709e-05	-4.44089209850063e-16			Age in years with > 1 decimals
	7.25	-0.162964839183113	7.56162809003591e-05	-4.44089209850063e-16			Height in cm, with one decimal
	7.5	-0.15997348936191	6.77323650402073e-05	-4.44089209850063e-16
	7.75	-0.156547030092623	6.01493478737947e-05	-4.44089209850063e-16			For 4-88 years:
	8	-0.152661522278176	5.28711157514739e-05	-4.44089209850063e-16			Linearly interpolate Mspline , Sspline and Lspline for appropriate age (e.g. 4.3 yr) from look-up tables
	8.25	-0.148299184865142	4.59010134308269e-05	-4.44089209850063e-16
	8.5	-0.143448370520876	3.92400888593603e-05	-4.44089209850063e-16
	8.75	-0.138103785910747	3.28875716757437e-05	-4.44089209850063e-16
	9	-0.132302350970292	2.68412982851185e-05	-4.44089209850063e-16
	9.25	-0.126118739414274	2.10980162851371e-05	-4.44089209850063e-16
	9.5	-0.119620254831077	1.56535829780591e-05	-8.88178419700125e-16
	9.75	-0.112865717900986	1.05031664159316e-05	-4.44089209850063e-16
	10	-0.105906618259461	5.64141105408034e-06	-8.88178419700125e-16
	10.25	-0.0987817684820591	1.06211007477874e-06	-4.44089209850063e-16
	10.5	-0.0915023851702497	-3.24283696517824e-06	-4.44089209850063e-16
	10.75	-0.0840735787821725	-7.28181631703961e-06	-8.88178419700125e-16
	11	-0.0765004290233993	-1.10630285776736e-05	-4.44089209850063e-16
	11.25	-0.0687879522247705	-1.45944712695023e-05	-4.44089209850063e-16
	11.5	-0.0609410821603884	-1.78839271058884e-05	-8.88178419700125e-16
	11.75	-0.0529655152159396	-2.09391993746255e-05	-8.88178419700125e-16
	12	-0.0448748764225364	-2.37701354388609e-05	-4.44089209850063e-16
	12.25	-0.0366859771607597	-2.63872875692073e-05	-4.44089209850063e-16
	12.5	-0.0284140512534261	-2.8800569053633e-05	-4.44089209850063e-16
	12.75	-0.0200728699557757	-3.10192897969852e-05	-4.44089209850063e-16
	13	-0.0116748921486032	-3.30522026703584e-05	-8.88178419700125e-16
	13.25	-0.00323139726601696	-3.49075455605696e-05	-8.88178419700125e-16
	13.5	0.00524679822023266	-3.65931099839401e-05	-4.44089209850063e-16
	13.75	0.0137307389291923	-3.81172150956122e-05	-8.88178419700125e-16
	14	0.0221720253665296	-3.94888009582761e-05	-4.44089209850063e-16
	14.25	0.0305260112593562	-4.07162754259005e-05	-8.88178419700125e-16
	14.5	0.0387527274931543	-4.18074899648513e-05	-8.88178419700125e-16
	14.75	0.0468164174475234	-4.27697841569596e-05	-4.44089209850063e-16
	15	0.0546851223343108	-4.3610026006391e-05	-8.88178419700125e-16
	15.25	0.0623303105666295	-4.43346485052842e-05	-4.44089209850063e-16
	15.5	0.0697265457040821	-4.49496827579221e-05	-4.44089209850063e-16
	15.75	0.0768520425477721	-4.5461091140897e-05	-4.44089209850063e-16
	16	0.0836908886542975	-4.58756780838954e-05	-8.88178419700125e-16
	16.25	0.0902299344774615	-4.62000965721909e-05	-4.44089209850063e-16
	16.5	0.0964576720973209	-4.64405497713205e-05	-4.44089209850063e-16
	16.75	0.102364079177846	-4.66028256931317e-05	-4.44089209850063e-16
	17	0.107940478079476	-4.669232871235e-05	-8.88178419700125e-16
	17.25	0.113179408761589	-4.67141083426714e-05	-8.88178419700125e-16
	17.5	0.118074514434833	-4.66728855463838e-05	-8.88178419700125e-16
	17.75	0.122620439201619	-4.65730768404171e-05	-8.88178419700125e-16
	18	0.126812752940834	-4.64188167810242e-05	-4.44089209850063e-16
	18.25	0.130654712075238	-4.62141359807156e-05	-4.44089209850063e-16
	18.5	0.134163698800133	-4.59631298699303e-05	-8.88178419700125e-16
	18.75	0.137357860504252	-4.56696694468572e-05	-4.44089209850063e-16
	19	0.140254333378568	-4.53373775080035e-05	-4.44089209850063e-16
	19.25	0.142869272507969	-4.49696451421122e-05	-4.44089209850063e-16
	19.5	0.145217930474228	-4.4569648090409e-05	-8.88178419700125e-16
	19.75	0.147314713438659	-4.41403614488411e-05	-4.44089209850063e-16
	20	0.149173235240772	-4.36845732896263e-05	-4.44089209850063e-16
	20.25	0.150806367413379	-4.32048972334176e-05	-8.88178419700125e-16
	20.5	0.152226285554192	-4.27037840775579e-05	-8.88178419700125e-16
	20.75	0.153444512787331	-4.2183532649176e-05	-8.88178419700125e-16
	21	0.154471753539429	-4.16462529051476e-05	-4.44089209850063e-16
	21.25	0.155317119292025	-4.10936907642157e-05	-4.44089209850063e-16
	21.5	0.155988937569898	-4.05274126609179e-05	-4.44089209850063e-16
	21.75	0.156495129689157	-3.99488920244107e-05	-8.88178419700125e-16
	22	0.156843233627546	-3.93595150400827e-05	-8.88178419700125e-16
	22.25	0.157040425628832	-3.87605860643347e-05	-8.88178419700125e-16
	22.5	0.157093540395206	-3.81533326647698e-05	-8.88178419700125e-16
	22.75	0.157009089969678	-3.75389103108859e-05	-8.88178419700125e-16
	23	0.156793281407976	-3.69184067490202e-05	-4.44089209850063e-16
	23.25	0.156452033326861	-3.62928460784229e-05	-4.44089209850063e-16
	23.5	0.155990991413818	-3.56631925586548e-05	-4.44089209850063e-16
	23.75	0.155415542966489	-3.50303541578612e-05	-8.88178419700125e-16
	24	0.154730830539711	-3.43951858774449e-05	-8.88178419700125e-16
	24.25	0.153941740924877	-3.37584312322114e-05	-8.88178419700125e-16
	24.5	0.153052783572116	-3.31203796721802e-05	-4.44089209850063e-16
	24.75	0.152068205447568	-3.24811370329137e-05	-8.88178419700125e-16
	25	0.150992069643902	-3.18408038297857e-05	-8.88178419700125e-16
	25.25	0.149828264783181	-3.11994760635592e-05	-8.88178419700125e-16
	25.5	0.148580513667273	-3.05572454413205e-05	-8.88178419700125e-16
	25.75	0.147252381430947	-2.99141995865337e-05	-4.44089209850063e-16
	26	0.145847283232122	-2.92704222386586e-05	-4.44089209850063e-16
	26.25	0.144368491505459	-2.86259934370037e-05	-8.88178419700125e-16
	26.5	0.142819142810719	-2.798098969925e-05	-4.44089209850063e-16
	26.75	0.141202244309687	-2.73354841970885e-05	-4.44089209850063e-16
	27	0.139520679862901	-2.66895468938877e-05	-4.44089209850063e-16
	27.25	0.137777215822256	-2.60432447121151e-05	-4.44089209850063e-16
	27.5	0.135974506495016	-2.53966416727813e-05	-4.44089209850063e-16
	27.75	0.134115099284996	-2.47497990208956e-05	-8.88178419700125e-16
	28	0.132201478670792	-2.41027755303325e-05	-8.88178419700125e-16
	28.25	0.130236458835297	-2.34556292968424e-05	-4.44089209850063e-16
	28.5	0.128223001935488	-2.28084170601495e-05	-4.44089209850063e-16
	28.75	0.126163948132357	-2.21611931021659e-05	-8.88178419700125e-16
	29	0.124062017232415	-2.15140093617894e-05	-4.44089209850063e-16
	29.25	0.121919814211934	-2.08669155286056e-05	-8.88178419700125e-16
	29.5	0.119739834468875	-2.02199591474717e-05	-8.88178419700125e-16
	29.75	0.117524468794922	-1.95731857095538e-05	-8.88178419700125e-16
	30	0.115276008097686	-1.89266387453646e-05	-4.44089209850063e-16
	30.25	0.11299664787901	-1.8280359910916e-05	-8.88178419700125e-16
	30.5	0.110688492488508	-1.76343890678776e-05	-8.88178419700125e-16
	30.75	0.108353559161056	-1.69887643606259e-05	-8.88178419700125e-16
	31	0.105993781854384	-1.63435222917396e-05	-8.88178419700125e-16
	31.25	0.103611014896755	-1.56986977921658e-05	-4.44089209850063e-16
	31.5	0.101207036452758	-1.50543242865009e-05	-8.88178419700125e-16
	31.75	0.0987835518208406	-1.44104337580497e-05	-8.88178419700125e-16
	32	0.0963421965722979	-1.37670568094439e-05	-4.44089209850063e-16
	32.25	0.093884538531233	-1.31242223913031e-05	-8.88178419700125e-16
	32.5	0.091412130867127	-1.24819743110294e-05	-8.88178419700125e-16
	32.75	0.0889265738823308	-1.18403906232967e-05	-4.44089209850063e-16
	33	0.0864294251585687	-1.1199553425767e-05	-8.88178419700125e-16
	33.25	0.0839221771992911	-1.05595407757786e-05	-4.44089209850063e-16
	33.5	0.0814062612152959	-9.92042721104092e-06	-8.88178419700125e-16
	33.75	0.0788830496803179	-9.28228390084662e-06	-8.88178419700125e-16
	34	0.0763538587723023	-8.64517878595983e-06	-8.88178419700125e-16
	34.25	0.0738199506999049	-8.00917671717194e-06	-8.88178419700125e-16
	34.5	0.0712825359253664	-7.37433958608591e-06	-8.88178419700125e-16
	34.75	0.0687427752836864	-6.74072644812895e-06	-4.44089209850063e-16
	35	0.0662017820081218	-6.10839364334481e-06	-4.44089209850063e-16
	35.25	0.0636606236590946	-5.47739490541765e-06	-4.44089209850063e-16
	35.5	0.0611203239725491	-4.84778147291642e-06	-8.88178419700125e-16
	35.75	0.0585818646296161	-4.21960219720852e-06	-4.44089209850063e-16
	36	0.056046186930228	-3.59290362972331e-06	-8.88178419700125e-16
	36.25	0.0535141934152783	-2.96773012498086e-06	-8.88178419700125e-16
	36.5	0.0509867494028171	-2.34412393007588e-06	-8.88178419700125e-16
	36.75	0.048464684462779	-1.72212526683424e-06	-8.88178419700125e-16
	37	0.0459487938252465	-1.10177241618992e-06	-8.88178419700125e-16
	37.25	0.0434398395951447	-4.83101801673769e-07	-8.88178419700125e-16
	37.5	0.0409384668044304	1.33850222239218e-07	-8.88178419700125e-16
	37.75	0.0384447437009872	7.49038018943438e-07	-8.88178419700125e-16
	38	0.0359585187268738	1.36241376091917e-06	-8.88178419700125e-16
	38.25	0.0334796439928731	1.97393184286909e-06	-8.88178419700125e-16
	38.5	0.0310079759040889	2.58354880644518e-06	-8.88178419700125e-16
	38.75	0.0285433749365982	3.19122325143084e-06	-4.44089209850063e-16
	39	0.0260857055082049	3.79691576180008e-06	-4.44089209850063e-16
	39.25	0.0236348358571359	4.40058882400507e-06	-8.88178419700125e-16
	39.5	0.0211906379039117	5.0022067534794e-06	-8.88178419700125e-16
	39.75	0.018752987135958	5.60173562358379e-06	-4.44089209850063e-16
	40	0.0163217624856902	6.19914319810455e-06	-8.88178419700125e-16
	40.25	0.0138968462186853	6.79439886286382e-06	-8.88178419700125e-16
	40.5	0.0114781238205826	7.38747356732183e-06	-8.88178419700125e-16
	40.75	0.00906548389582973	7.97833976018403e-06	-8.88178419700125e-16
	41	0.0066588180625704	8.56697133655437e-06	-8.88178419700125e-16
	41.25	0.00425802085853633	9.15334357576292e-06	-8.88178419700125e-16
	41.5	0.0018629896446658	9.73743309451436e-06	-8.88178419700125e-16
	41.75	-0.000526375483920205	1.03192177915989e-05	-8.88178419700125e-16
	42	-0.00291017178614084	1.08986768014852e-05	-8.88178419700125e-16
	42.25	-0.00528849395795028	1.14757904443596e-05	-8.88178419700125e-16
	42.5	-0.0076614342122312	1.20505401839388e-05	-8.88178419700125e-16
	42.75	-0.0100290822773204	1.26229085835039e-05	-8.88178419700125e-16
	43	-0.0123915265040271	1.31928792503899e-05	-8.88178419700125e-16
	43.25	-0.014748853867502	1.37604368011246e-05	-8.88178419700125e-16
	43.5	-0.0171013675436136	1.43255643498819e-05	-4.44089209850063e-16
	43.75	-0.019449676232373	1.48882424582109e-05	-8.88178419700125e-16
	44	-0.0217943950098789	1.54484524985676e-05	-8.88178419700125e-16
	44.25	-0.0241361186736722	1.6006176922545e-05	-8.88178419700125e-16
	44.5	-0.0264754223047809	1.65613992200164e-05	-8.88178419700125e-16
	44.75	-0.0288128619271273	1.71141038818323e-05	-8.88178419700125e-16
	45	-0.0311489751332061	1.76642763662915e-05	-8.88178419700125e-16
	45.25	-0.0334842816763388	1.82119030578409e-05	-8.88178419700125e-16
	45.5	-0.0358192840476725	1.87569712364333e-05	-4.44089209850063e-16
	45.75	-0.0381544680312675	1.92994690451087e-05	-8.88178419700125e-16
	46	-0.04049030323689	1.98393854549117e-05	-8.88178419700125e-16
	46.25	-0.0428272436175163	2.03767102375796e-05	-8.88178419700125e-16
	46.5	-0.0451657279686355	2.09114339360106e-05	-8.88178419700125e-16
	46.75	-0.047506180408627	2.14435478342878e-05	-4.44089209850063e-16
	47	-0.0498490108414025	2.19730439308119e-05	-8.88178419700125e-16
	47.25	-0.0521946154078581	2.24999149127658e-05	-8.88178419700125e-16
	47.5	-0.0545433769132018	2.30241541296916e-05	-4.44089209850063e-16
	47.75	-0.0568956652624415	2.35457555759488e-05	-8.88178419700125e-16
	48	-0.0592518378284801	2.40647138491923e-05	-8.88178419700125e-16
	48.25	-0.0616122398886176	2.45810241514821e-05	-8.88178419700125e-16
	48.5	-0.0639772049632867	2.50946822495379e-05	-8.88178419700125e-16
	48.75	-0.0663470552025824	2.5605684461194e-05	-8.88178419700125e-16
	49	-0.0687221017284472	2.61140276345273e-05	-8.88178419700125e-16
	49.25	-0.0711026449786392	2.66197091260967e-05	-8.88178419700125e-16
	49.5	-0.0734889750474661	2.71227267829577e-05	-8.88178419700125e-16
	49.75	-0.0758813718785252	2.76230789366672e-05	-8.88178419700125e-16
	50	-0.0782801059369085	2.81207643486603e-05	-4.44089209850063e-16
	50.25	-0.0806854099289573	2.86157849889168e-05	-8.88178419700125e-16
	50.5	-0.0830974367072503	2.9108150162882e-05	-8.88178419700125e-16
	50.75	-0.0855163219052724	2.95978704003552e-05	-8.88178419700125e-16
	51	-0.0879421957095285	3.00849563090733e-05	-8.88178419700125e-16
	51.25	-0.0903751830647508	3.05694185764871e-05	-8.88178419700125e-16
	51.5	-0.0928154038310449	3.10512679577712e-05	-8.88178419700125e-16
	51.75	-0.0952629729448713	3.15305152682743e-05	-8.88178419700125e-16
	52	-0.0977180005730673	3.20071713861836e-05	-8.88178419700125e-16
	52.25	-0.100180592262632	3.24812472403124e-05	-8.88178419700125e-16
	52.5	-0.102650849080872	3.2952753808102e-05	-8.88178419700125e-16
	52.75	-0.105128867760348	3.34217021116245e-05	-8.88178419700125e-16
	53	-0.107614740831028	3.38881032149185e-05	-8.88178419700125e-16
	53.25	-0.110108556747729	3.4351968214219e-05	-8.88178419700125e-16
	53.5	-0.112610400022161	3.48133082395119e-05	-8.88178419700125e-16
	53.75	-0.115120351340574	3.5272134446318e-05	-8.88178419700125e-16
	54	-0.117638487685332	3.5728458017692e-05	-8.88178419700125e-16
	54.25	-0.120164882448515	3.6182290155784e-05	-8.88178419700125e-16
	54.5	-0.122699605541696	3.66336420798419e-05	-8.88178419700125e-16
	54.75	-0.125242723503522	3.70825250211038e-05	-8.88178419700125e-16
	55	-0.127794299605753	3.75289502241305e-05	-8.88178419700125e-16
	55.25	-0.130354393954569	3.79729289419206e-05	-8.88178419700125e-16
	55.5	-0.132923063586352	3.84144724319135e-05	-8.88178419700125e-16
	55.75	-0.135500362559815	3.88535919519928e-05	-8.88178419700125e-16
	56	-0.138086342055733	3.92902987631505e-05	-8.88178419700125e-16
	56.25	-0.140681050457303	3.97246041203836e-05	-8.88178419700125e-16
	56.5	-0.143284533373569	4.01565192780229e-05	-8.88178419700125e-16
	56.75	-0.145896833736847	4.05860554835158e-05	-8.88178419700125e-16
	57	-0.148517992508559	4.1013223955888e-05	-8.88178419700125e-16
	57.25	-0.151148048109027	4.14380359046174e-05	-8.88178419700125e-16
	57.5	-0.153787038022744	4.18605024770091e-05	-8.88178419700125e-16
	57.75	-0.156435019904897	4.22806340489856e-05	-8.88178419700125e-16
	58	-0.159091923608182	4.26984451975532e-05	-8.88178419700125e-16
	58.25	-0.161757608187006	4.31139527867774e-05	-8.88178419700125e-16
	58.5	-0.164431712694727	4.35271809802185e-05	-8.88178419700125e-16
	58.75	-0.167113882198024	4.39381536490036e-05	-8.88178419700125e-16
	59	-0.169803777477343	4.43468940447556e-05	-8.88178419700125e-16
	59.25	-0.172501066693144	4.47534250829218e-05	-8.88178419700125e-16
	59.5	-0.175205425218445	4.51577693456606e-05	-8.88178419700125e-16
	59.75	-0.177916535470912	4.55599490891689e-05	-8.88178419700125e-16
	60	-0.180634086753251	4.59599862514537e-05	-8.88178419700125e-16
	60.25	-0.183357775095335	4.63579024583272e-05	-8.88178419700125e-16
	60.5	-0.186087303099008	4.67537190231848e-05	-8.88178419700125e-16
	60.75	-0.188822379793105	4.71474569603281e-05	-8.88178419700125e-16
	61	-0.191562720487042	4.75391369869627e-05	-8.88178419700125e-16
	61.25	-0.19430804662831	4.7928779530082e-05	-8.88178419700125e-16
	61.5	-0.19705808566459	4.83164047284657e-05	-8.88178419700125e-16
	61.75	-0.199812570911131	4.8702032441561e-05	-8.88178419700125e-16
	62	-0.202571241416933	4.90856822521479e-05	-8.88178419700125e-16
	62.25	-0.205333841838392	4.94673734712237e-05	-8.88178419700125e-16
	62.5	-0.208100122315697	4.98471251453303e-05	-8.88178419700125e-16
	62.75	-0.210869838351313	5.02249560587753e-05	-8.88178419700125e-16
	63	-0.213642750688168	5.06008847387385e-05	-8.88178419700125e-16
	63.25	-0.216418625197884	5.09749294597128e-05	-8.88178419700125e-16
	63.5	-0.219197232767488	5.13471082497219e-05	-8.88178419700125e-16
	63.75	-0.221978349189371	5.17174388932062e-05	-8.88178419700125e-16
	64	-0.224761755052473	5.20859389347983e-05	-8.88178419700125e-16
	64.25	-0.227547235634145	5.24526256782121e-05	-8.88178419700125e-16
	64.5	-0.230334580810917	5.28175162055611e-05	-8.88178419700125e-16
	64.75	-0.233123584948119	5.31806273686986e-05	-8.88178419700125e-16
	65	-0.235914046802913	5.35419757934363e-05	-8.88178419700125e-16
	65.25	-0.23870576943183	5.39015778839858e-05	-8.88178419700125e-16
	65.5	-0.241498560098123	5.42594498371685e-05	-8.88178419700125e-16
	65.75	-0.244292230184879	5.46156076328685e-05	-8.88178419700125e-16
	66	-0.247086595105054	5.49700670360309e-05	-8.88178419700125e-16
	66.25	-0.24988147421003	5.53228436115383e-05	-8.88178419700125e-16
	66.5	-0.252676690672567	5.56739527710626e-05	-8.88178419700125e-16
	66.75	-0.255472071615596	5.60234095023926e-05	-8.88178419700125e-16
	67	-0.258267447557619	5.63712289896046e-05	-8.88178419700125e-16
	67.25	-0.261062651932967	5.67174271395299e-05	-8.88178419700125e-16
	67.5	-0.263857520199828	5.70620216426843e-05	-8.88178419700125e-16
	67.75	-0.266651890897178	5.74050305086615e-05	-8.88178419700125e-16
	68	-0.269445606106816	5.77464713700238e-05	-8.88178419700125e-16
	68.25	-0.272238511285851	5.80863616126415e-05	-8.88178419700125e-16
	68.5	-0.275030455190985	5.84247183852415e-05	-8.88178419700125e-16
	68.75	-0.277821289825557	5.87615585814216e-05	-8.88178419700125e-16
	69	-0.280610870367079	5.90968988520846e-05	-8.88178419700125e-16
	69.25	-0.283399055100647	5.94307556109896e-05	-8.88178419700125e-16
	69.5	-0.286185705352146	5.97631450360847e-05	-8.88178419700125e-16
	69.75	-0.288970685431453	6.0094083078166e-05	-8.88178419700125e-16
	70	-0.291753862569456	6.04235854657631e-05	-8.88178419700125e-16
	70.25	-0.294535106855305	6.07516677058051e-05	-8.88178419700125e-16
	70.5	-0.297314291160042	6.10783450674113e-05	-8.88178419700125e-16
	70.75	-0.300091291118429	6.14036326287426e-05	-8.88178419700125e-16
	71	-0.302865985045564	6.17275452501342e-05	-8.88178419700125e-16
	71.25	-0.305638253883204	6.20500975820892e-05	-8.88178419700125e-16
	71.5	-0.308407981153463	6.23713040743823e-05	-8.88178419700125e-16
	71.75	-0.311175052903195	6.26911789760598e-05	-8.88178419700125e-16
	72	-0.313939357652758	6.30097363398807e-05	-8.88178419700125e-16
	72.25	-0.31670078634515	6.33269900240929e-05	-8.88178419700125e-16
	72.5	-0.319459232297033	6.36429536955418e-05	-8.88178419700125e-16
	72.75	-0.322214591155662	6.39576408412168e-05	-8.88178419700125e-16
	73	-0.324966760844987	6.42710647626998e-05	-8.88178419700125e-16
	73.25	-0.32771564151909	6.45832385735012e-05	-8.88178419700125e-16
	73.5	-0.330461135522931	6.48941752103838e-05	-8.88178419700125e-16
	73.75	-0.333203147347904	6.52038874404681e-05	-8.88178419700125e-16
	74	-0.335941583585646	6.55123878585684e-05	-8.88178419700125e-16
	74.25	-0.338676352887667	6.58196888903007e-05	-8.88178419700125e-16
	74.5	-0.341407365925289	6.61258027945255e-05	-8.88178419700125e-16
	74.75	-0.34413453534674	6.64307416657905e-05	-8.88178419700125e-16
	75	-0.346857775738449	6.6734517437439e-05	-8.88178419700125e-16
	75.25	-0.349577003587415	6.70371418842741e-05	-8.88178419700125e-16
	75.5	-0.352292137247529	6.73386266296649e-05	-8.88178419700125e-16
	75.75	-0.355003096894965	6.76389831397728e-05	-8.88178419700125e-16
	76	-0.357709804499393	6.79382227297687e-05	-8.88178419700125e-16
	76.25	-0.360412183808183	6.82363565533972e-05	-8.88178419700125e-16
	76.5	-0.36311016039603	6.8533395570336e-05	-8.88178419700125e-16
	76.75	-0.365803661201934	6.8829350752253e-05	-1.77635683940025e-15
	77	-0.368492614779109	6.91242329478037e-05	-8.88178419700125e-16
	77.25	-0.371176951317233	6.94180528593158e-05	-8.88178419700125e-16
	77.5	-0.373856603217249	6.97108207448061e-05	-8.88178419700125e-16
	77.75	-0.376531505352867	7.00025462752052e-05	-8.88178419700125e-16
	78	-0.379201594175356	7.02932389653466e-05	-1.77635683940025e-15
	78.25	-0.381866807658538	7.05829081399934e-05	-8.88178419700125e-16
	78.5	-0.384527086483862	7.08715624651024e-05	-8.88178419700125e-16
	78.75	-0.387182373954106	7.11592106108494e-05	-8.88178419700125e-16
	79	-0.38983261259564	7.14458612414148e-05	-8.88178419700125e-16
	79.25	-0.392477745664197	7.17315229255e-05	-1.77635683940025e-15
	79.5	-0.39511771775418	7.20162041298877e-05	-1.77635683940025e-15
	79.75	-0.397752474772791	7.2299913222329e-05	-8.88178419700125e-16
	80	-0.400381963914654	7.25826584710987e-05	-8.88178419700125e-16
	80.25	-0.403006133636987	7.28644480481044e-05	-8.88178419700125e-16
	80.5	-0.40562493451022	7.31452900073482e-05	-8.88178419700125e-16
	80.75	-0.408238325317829	7.34251921337137e-05	-8.88178419700125e-16
	81	-0.410846269258473	7.37041620375578e-05	-8.88178419700125e-16
	81.25	-0.413448729040056	7.39822072806096e-05	-1.77635683940025e-15
	81.5	-0.416045642976568	7.42593359766008e-05	-8.88178419700125e-16
	81.75	-0.418636929475751	7.45355566806882e-05	-1.77635683940025e-15
	82	-0.421222508225597	7.48108778554357e-05	-8.88178419700125e-16
	82.25	-0.423802334518568	7.50853070077273e-05	-1.77635683940025e-15
	82.5	-0.426376439384986	7.53588496775759e-05	-8.88178419700125e-16
	82.75	-0.428944863557783	7.56315111025696e-05	-1.77635683940025e-15
	83	-0.431507647326917	7.59032964747774e-05	-8.88178419700125e-16
	83.25	-0.434064830545319	7.61742109414154e-05	-8.88178419700125e-16
	83.5	-0.436616426024713	7.64442602749771e-05	-8.88178419700125e-16
	83.75	-0.439162347601641	7.6713452687116e-05	-8.88178419700125e-16
	84	-0.441702487900526	7.69817968699904e-05	-8.88178419700125e-16
	84.25	-0.444236741742191	7.72493014067344e-05	-8.88178419700125e-16
	84.5	-0.446765006104457	7.75159747725684e-05	-8.88178419700125e-16
	84.75	-0.449287180083511	7.77818253381302e-05	-8.88178419700125e-16
	85	-0.451803164856008	7.80468613688079e-05	-8.88178419700125e-16
	85.25	-0.454312863641903	7.83110910282936e-05	-8.88178419700125e-16
	85.5	-0.456816181668001	7.85745223788048e-05	-8.88178419700125e-16
	85.75	-0.459313026132197	7.8837163382639e-05	-8.88178419700125e-16
	86	-0.461803306168408	7.90990219048382e-05	-8.88178419700125e-16
	86.25	-0.464286932812165	7.93601057129667e-05	-8.88178419700125e-16
	86.5	-0.466763818966864	7.96204224795538e-05	-8.88178419700125e-16
	86.75	-0.469233879370661	7.9879979783648e-05	-8.88178419700125e-16
	87	-0.471697030563973	8.01387851114832e-05	-1.77635683940025e-15
	87.25	-0.474153191806401	8.03968458342741e-05	-8.88178419700125e-16
	87.5	-0.476602330592124	8.06541680526962e-05	-8.88178419700125e-16
	87.75	-0.479044481811192	8.09107561128286e-05	-8.88178419700125e-16
	88	-0.481479685222242	8.11666141915524e-05	-8.88178419700125e-16

## Sheet: FEV1FVC ratio_males
Lookup tables
age	Mspline	Sspline	Lspline
4	-0.0293420342470965	0.123433659118025	0		Coefficients to be used with lookup tables for Mspline, Sspline and Lspline (4-88 years)
4.25	-0.0283858364842116	0.117250991346969	0		Coefficients
4.5	-0.0274843092530926	0.111421817118666	0		Intercept	a0 0.580730	p0 -3.4115	q0 1
4.75	-0.026631537648503	0.105907891317521	0		Height	a1 - 0.110027	/	/
5	-0.0258224709609742	0.100676837032225	0		Age	a2 - 0.051262	p1 0.2204	q1 0
5.25	-0.025047659398283	0.0956987338697952	0		Splines	Mspline	Sspline	Lspline
5.5	-0.0242955371805531	0.090946428793703	0
5.75	-0.023557547193738	0.0863962845291724	0
6	-0.0228230645115896	0.0820188114810372	0		L = q0 + q1*ln(Age) + Lspline=1
6.25	-0.0220820110105752	0.0777851407339964	0		M = exp(a0 + a1*ln(Height) + a2*ln(Age) + Mspline)
6.5	-0.0213266407270885	0.0736713779606584	0		S = exp(p0 + p1*ln(Age) + Sspline)
6.75	-0.0205605211432471	0.0696596500478193	0		LLN (5th percentile) = exp(ln(1 - 1,645*L*S)/L +ln(M))
7	-0.0198053369877811	0.0657386918195417	0
7.25	-0.0190806805166667	0.061899332308355	0		Age in years with > 1 decimals
7.5	-0.0184021306202009	0.0581336749262187	0		Height in cm, with one decimal
7.75	-0.0177801441016986	0.0544357806353029	0
8	-0.0172184078958493	0.0508025656280759	0		For 4-88 years:
8.25	-0.0167189182521075	0.047231485194136	0		Linearly interpolate Mspline , Sspline and Lspline for appropriate age (e,g, 4,3 yr) from look-up tables
8.5	-0.016282956113566	0.043720142742055	0
8.75	-0.0159107763269744	0.0402663136131074	0
9	-0.0155900565080416	0.036868825135838	0
9.25	-0.0152971521452346	0.0335274588026335	0
9.5	-0.0150112599410037	0.0302418670731179	0
9.75	-0.0147146664041392	0.0270115513331493	0
10	-0.0143922992297751	0.0238358920320216	0
10.25	-0.0140322845936036	0.0207150683239283	0
10.5	-0.0136279564132367	0.0176523084507272	0
10.75	-0.0131745133973411	0.0146509644327062	0
11	-0.012667980267063	0.0117137520959858	0
11.25	-0.0121050931160209	0.00884284149856462	0
11.5	-0.0114832019557538	0.00603993399400515	0
11.75	-0.0108006791571974	0.00330650255693676	0
12	-0.0100609550609294	0.000645303900956851	0
12.25	-0.00926974637194861	-0.00194053306841946	0
12.5	-0.00843227925310641	-0.00444843042624488	0
12.75	-0.00755331082856442	-0.00687630106565562	0
13	-0.00663717610802156	-0.0092224866252999	0
13.25	-0.00568782957590508	-0.0114857033881992	0
13.5	-0.00470891741944895	-0.0136649995068154	0
13.75	-0.00370490085370356	-0.0157598514820876	0
14	-0.00268115688392712	-0.0177701370205403	0
14.25	-0.00164263205264853	-0.0196959299037101	0
14.5	-0.000593807029062643	-0.0215374647017961	0
14.75	0.000461258905587902	-0.023295115256956	0
15	0.00151888805741229	-0.0249693757826206	0
15.25	0.00257574865333615	-0.0265608442468452	0
15.5	0.003628822885334	-0.0280702077022483	0
15.75	0.00467522323777686	-0.0294983721426663	0
16	0.00571171494933759	-0.0308468673119946	0
16.25	0.00673521357521395	-0.0321173567531527	0
16.5	0.00774292826336109	-0.0333114775796801	0
16.75	0.0087323357590271	-0.0344308391303292	0
17	0.0097011569356858	-0.0354770218848794	0
17.25	0.0106473355394879	-0.0364515766485307	0
17.5	0.0115690189048663	-0.0373560239943056	0
17.75	0.0124645404232122	-0.0381918539678248	0
18	0.0133324031379488	-0.0389605271589568	0
18.25	0.0141710790848871	-0.0396639473972802	0
18.5	0.0149788188903374	-0.0403049118132008	0
18.75	0.0157540012808671	-0.0408861931114854	0
19	0.0164951687369608	-0.0414104215028672	0
19.25	0.0172010151224398	-0.0418800910647472	0
19.5	0.0178703729998375	-0.0422975691507976	0
19.75	0.0185022024687672	-0.0426651039685892	0
20	0.0190955808837717	-0.0429848317663439	0
20.25	0.0196496934318425	-0.0432587835029024	0
20.5	0.0201638244895245	-0.0434888910509938	0
20.75	0.0206373493148984	-0.0436769927260947	0
21	0.0210699066490476	-0.0438249566011417	0
21.25	0.021462099923762	-0.0439351496326554	0
21.5	0.0218148154525079	-0.0440099993774843	0
21.75	0.0221289152686506	-0.0440518007012076	0
22	0.0224052381080002	-0.0440627239284894	0
22.25	0.0226446001365455	-0.0440448222916312	0
22.5	0.0228477956561866	-0.0440000388744384	0
22.75	0.0230155977880823	-0.0439302130877395	0
23	0.023148759134394	-0.0438370867137738	0
23.25	0.0232480124185495	-0.0437223095506778	0
23.5	0.0233140711050606	-0.0435874446892601	0
23.75	0.0233476299982707	-0.0434339734445151	0
24	0.0233493658196226	-0.0432632999755289	0
24.25	0.0233200728523545	-0.0430766590840226	0
24.5	0.0232614208578183	-0.0428745790892502	0
24.75	0.0231753686628105	-0.0426573050131975	0
25	0.023063779369592	-0.0424250774488244	0
25.25	0.0229284243052831	-0.0421781334287097	0
25.5	0.0227709879011614	-0.0419167064128283	0
25.75	0.0225930722786716	-0.0416410262842852	0
26	0.0223962015627148	-0.0413513193529762	0
26.25	0.0221818259399326	-0.0410478083637966	0
26.5	0.0219513254794376	-0.0407307125107801	0
26.75	0.0217060137330607	-0.0404002474623852	0
27	0.0214471411240544	-0.0400566253740071	0
27.25	0.0211758981467861	-0.0397000549248769	0
27.5	0.0208934183824122	-0.0393307413477779	0
27.75	0.0206007813564319	-0.0389488864643064	0
28	0.0202989974691757	-0.038554681548352	0
28.25	0.0199888342226694	-0.0381482361125931	0
28.5	0.0196709032029761	-0.0377296121369857	0
28.75	0.0193457869070869	-0.0372988744353746	0
29	0.0190140419478796	-0.0368560911396076	0
29.25	0.0186762002687976	-0.0364013334082323	0
29.5	0.018332770297015	-0.0359346751653815	0
29.75	0.017984238034864	-0.0354561928517656	0
30	0.0176310680952745	-0.0349659651951266	0
30.25	0.0172737046832879	-0.0344640729945609	0
30.5	0.0169125725274764	-0.0339505989200379	0
30.75	0.0165480777635412	-0.033425627323926	0
31	0.0161806087734869	-0.0328892440663386	0
31.25	0.0158105369825379	-0.0323415363516655	0
31.5	0.0154382176160466	-0.031782592575536	0
31.75	0.0150639904189176	-0.0312125021821155	0
32	0.0146881803398524	-0.0306313555322717	0
32.25	0.0143110999837684	-0.0300392427389973	0
32.5	0.0139329598952561	-0.0294363056015476	0
32.75	0.0135537629138317	-0.0288227986986844	0
33	0.0131734709324617	-0.0281989935391982	0
33.25	0.0127920500332535	-0.0275651527656597	0
33.5	0.012409468406301	-0.0269215315610998	0
33.75	0.0120256962537162	-0.0262683779014368	0
34	0.0116407056922265	-0.0256059328017693	0
34.25	0.0112544706611829	-0.0249344305511108	0
34.5	0.0108669668355889	-0.0242540989396072	0
34.75	0.0104781715430547	-0.0235651594751474	0
35	0.0100880636852151	-0.0228678275930263	0
35.25	0.00969662366209112	-0.022162312853522	0
35.5	0.00930383330112128	-0.021448819136114	0
35.75	0.00890967579017116	-0.0207275448277846	0
36	0.00851413561098957	-0.0199986829934278	0
36.25	0.00811719847938497	-0.0192624215533606	0
36.5	0.0077188512859227	-0.0185189434450401	0
36.75	0.0073190820402641	-0.0177684267817555	0
37	0.00691787981791564	-0.0170110450042285	0
37.25	0.00651523473986326	-0.0162469670486356	0
37.5	0.00611115630196563	-0.015476369391962	0
37.75	0.00570577271745015	-0.0146995005777204	0
38	0.00529925415844962	-0.0139166316480965	0
38.25	0.00489176477205644	-0.0131280252080881	0
38.5	0.00448346274111827	-0.0123339356144996	0
38.75	0.00407450051953417	-0.0115346092707136	0
39	0.00366502503617527	-0.0107302848924249	0
39.25	0.00325517789575569	-0.00992119377230072	0
39.5	0.00284509557006257	-0.00910756002768176	0
39.75	0.00243490958335607	-0.00828960084451724	0
40	0.00202474668923558	-0.00746752670840278	0
40.25	0.00161472904117949	-0.00664154162920871	0
40.5	0.00120497435548128	-0.00581184335329166	0
40.75	0.000795596069088078	-0.00497862357344792	0
41	0.000386703489962836	-0.00414206812511742	0
41.25	-0.0000215980571612873	-0.00330235718054617	0
41.5	-0.000429207091635797	-0.00245966543163778	0
41.75	-0.000836025842461785	-0.00161416226868027	0
42	-0.00124196011939548	-0.000766011950838141	0
42.25	-0.00164691918853593	0.0000846262278000331	0
42.5	-0.00205081565311382	0.00093759778036917	0
42.75	-0.0024535653376615	0.00179275287785918	0
43	-0.00285508718773081	0.00264994614749625	0
43.25	-0.00325530316298095	0.00350903653541978	0
43.5	-0.00365414036466105	0.00436987604911776	0
43.75	-0.00405153185200174	0.00523230506173578	0
44	-0.00444741347919736	0.00609616748087749	0
44.25	-0.00484172352996759	0.0069613119916121	0
44.5	-0.0052344026341789	0.00782759191068738	0
44.75	-0.00562539368891296	0.00869486504041017	0
45	-0.00601464178286659	0.0095629935315098	0
45.25	-0.00640209412216175	0.0104318437448412	0
45.5	-0.00678769995994405	0.0113012861232109	0
45.75	-0.00717141052816517	0.0121711950657812	0
46	-0.00755317897139923	0.0130414488053172	0
46.25	-0.0079329602835323	0.0139119292917687	0
46.5	-0.00831071124664012	0.0147825220794631	0
46.75	-0.00868639037183222	0.0156531162173867	0
47	-0.00905995784190089	0.0165236041420354	0
47.25	-0.00943137545686773	0.0173938815775054	0
47.5	-0.00980060657996856	0.0182638474335608	0
47.75	-0.0101676160889095	0.0191334037177384	0
48	-0.0105323703212801	0.0200024554274427	0
48.25	-0.0108948370331587	0.0208709104803035	0
48.5	-0.0112549853479552	0.0217386796119112	0
48.75	-0.0116127857144561	0.0226056763009606	0
49	-0.011968209862933	0.0234718166846513	0
49.25	-0.0123212307635537	0.0243370194814734	0
49.5	-0.0126718225813803	0.0252012059133913	0
49.75	-0.0130199606914239	0.0260642996562721	0
50	-0.0133656214845416	0.026926226700176	0
50.25	-0.0137087945220258	0.0277869205459624	0
50.5	-0.0140495005767795	0.028646329942978	0
50.75	-0.0143877650042157	0.029504407342237	0
51	-0.0147236128000889	0.0303611067109548	0
51.25	-0.0150570685972763	0.0312163834893897	0
51.5	-0.0153881566723024	0.0320701945450703	0
51.75	-0.0157169009519025	0.0329224981314384	0
52	-0.0160433250200184	0.0337732538505877	0
52.25	-0.0163674521240426	0.0346224226131508	0
52.5	-0.016689305180648	0.0354699665999449	0
52.75	-0.0170089067827616	0.0363158492286817	0
53	-0.0173262792051307	0.0371600351176444	0
53.25	-0.0176414444097014	0.0380024900496361	0
53.5	-0.0179544240521982	0.0388431809424183	0
53.75	-0.0182652394869931	0.0396820758140013	0
54	-0.0185739117731207	0.0405191437539241	0
54.25	-0.0188804616793916	0.0413543548922441	0
54.5	-0.0191849096893659	0.0421876803693029	0
54.75	-0.01948727600663	0.0430190923083407	0
55	-0.0197875805599375	0.0438485637885417	0
55.25	-0.0200858430082023	0.0446760688188395	0
55.5	-0.0203820827449546	0.0455015823108562	0
55.75	-0.0206763189027755	0.0463250800529758	0
56	-0.0209685703587627	0.0471465386894661	0
56.25	-0.021258855737972	0.0479659356928224	0
56.5	-0.0215471934210768	0.0487832493458185	0
56.75	-0.0218336015476768	0.0495984587171305	0
57	-0.0221180979970355	0.0504115436220465	0
57.25	-0.022400700416649	0.0512224846203848	0
57.5	-0.0226814261683224	0.0520312629508228	0
57.75	-0.0229602915357168	0.0528378598884718	0
58	-0.0232373173340445	0.0536422611085579	0
58.25	-0.0235125267577865	0.05444445498168	0
58.5	-0.0237859510366311	0.0552444369749052	0
58.75	-0.0240576208834209	0.0560422029452123	0
59	-0.0243275661327799	0.0568377488371485	0
59.25	-0.0245958160626353	0.0576310709153054	0
59.5	-0.0248623994058122	0.0584221657535768	0
59.75	-0.0251273443621418	0.0592110302268862	0
60	-0.025390678610008	0.059997661502861	0
60.25	-0.0256524293174443	0.060782057032839	0
60.5	-0.0259126231525998	0.0615642145415212	0
60.75	-0.0261712862950692	0.0623441320219715	0
61	-0.0264284444460555	0.063121807726811	0
61.25	-0.0266841228383131	0.0638972401598261	0
61.5	-0.0269383462460165	0.0646704280684798	0
61.75	-0.0271911389946827	0.0654413704379051	0
62	-0.02744252497012	0.0662100664821468	0
62.25	-0.0276925276278686	0.0669765156385163	0
62.5	-0.0279411700022215	0.0677407175610401	0
62.75	-0.0281884747149252	0.0685026721138695	0
63	-0.028434463983331	0.0692623793640421	0
63.25	-0.0286791596291308	0.0700198395765166	0
63.5	-0.0289225830864593	0.0707750532084246	0
63.75	-0.0291647554097967	0.0715280209032292	0
64	-0.0294056972814452	0.0722787434840542	0
64.25	-0.0296454290185115	0.0730272219459018	0
64.5	-0.0298839705823673	0.0737734574589481	0
64.75	-0.0301213415841064	0.0745174513562432	0
65	-0.0303575612915829	0.0752592051282499	0
65.25	-0.0305926486367009	0.0759987204201145	0
65.5	-0.0308266222206958	0.076735999029629	0
65.75	-0.0310595003251194	0.0774710428988716	0
66	-0.0312913009177878	0.0782038541080565	0
66.25	-0.0315220416526896	0.0789344348756815	0
66.5	-0.0317517398428597	0.0796627875695655	0
66.75	-0.0319804126790283	0.0803889146066838	0
67	-0.0322080767559641	0.0811128186656132	0
67.25	-0.0324347476725778	0.0818345028656986	0
67.5	-0.0326604392138973	0.082553971133652	0
67.75	-0.0328851644991867	0.083271227685823	0
68	-0.033108936528137	0.0839862767801778	0
68.25	-0.0333317680887194	0.0846991227566742	0
68.5	-0.0335536717560712	0.085409770036573	0
68.75	-0.0337746599129577	0.0861182231117787	0
69	-0.0339947447482225	0.0868244865448924	0
69.25	-0.0342139382597944	0.0875285649672288	0
69.5	-0.0344322522574768	0.0882304630748125	0
69.75	-0.0346496983678812	0.0889301856287923	0
70	-0.0348662880376085	0.0896277374533403	0
70.25	-0.0350820325360127	0.0903231234312183	0
70.5	-0.0352969429555846	0.0910163484902817	0
70.75	-0.0355110302214242	0.0917074176262416	0
71	-0.0357243050899714	0.0923963358833499	0
71.25	-0.0359367781522769	0.0930831083533019	0
71.5	-0.0361484598381347	0.0937677401778956	0
71.75	-0.0363593604184077	0.0944502365448163	0
72	-0.0365694900079329	0.0951306026859546	0
72.25	-0.036778858568229	0.0958088438750822	0
72.5	-0.0369874759101047	0.0964849654257294	0
72.75	-0.0371953516973969	0.0971589726941233	0
73	-0.0374024954483886	0.0978308710724063	0
73.25	-0.037608916537781	0.0985006659844099	0
73.5	-0.0378146242004091	0.0991683628888631	0
73.75	-0.0380196275339105	0.0998339672790789	0
74	-0.0382239355004101	0.100497484678731	0
74.25	-0.0384275569290818	0.101158920640854	0
74.5	-0.0386305005185368	0.101818280746472	0
74.75	-0.0388327748387745	0.102475570602366	0
75	-0.0390343883335111	0.10313079584017	0
75.25	-0.0392353493224594	0.103783962115379	0
75.5	-0.0394356660045445	0.104435075107776	0
75.75	-0.039635346457859	0.105084140516773	0
76	-0.0398343986367962	0.105731164070411	0
76.25	-0.040032830333888	0.106376151576533	0
76.5	-0.040230649025865	0.107019109133105	0
76.75	-0.0404278626972558	0.107660042024978	0
77	-0.0406244792971939	0.108298955452586	0
77.25	-0.0408205066361028	0.108935854671805	0
77.5	-0.0410159512040131	0.109570746575189	0
77.75	-0.041210817601544	0.110203640454098	0
78	-0.0414051102290113	0.110834545741835	0
78.25	-0.0415988331414314	0.111463472204503	0
78.5	-0.0417919882274018	0.112090432387554	0
78.75	-0.0419845779739257	0.112715437978759	0
79	-0.0421766049879704	0.113338500299625	0
79.25	-0.0423680718117901	0.113959630612531	0
79.5	-0.0425589809727019	0.114578840082659	0
79.75	-0.0427493349831732	0.115196139779113	0
80	-0.0429391363409063	0.115811540676013	0
80.25	-0.043128387528924	0.116425053653585	0
80.5	-0.0433170910366198	0.117036689507477	0
80.75	-0.0435052495065758	0.117646459007537	0
81	-0.0436928656442052	0.118254372863276	0
81.25	-0.043879942101541	0.118860441677926	0
81.5	-0.0440664809165802	0.11946467570935	0
81.75	-0.0442524836192577	0.12006708491637	0
82	-0.0444379517295005	0.120667679173012	0
82.25	-0.0446228875617379	0.121266468617443	0
82.5	-0.0448072951654155	0.121863464059807	0
82.75	-0.0449911787789758	0.122458676314234	0
83	-0.0451745425927943	0.123052116097152	0
83.25	-0.0453573907498583	0.123643794028467	0
83.5	-0.0455397267233547	0.124233720362895	0
83.75	-0.0457215516328357	0.124821904261637	0
84	-0.0459028660655781	0.125408354581949	0
84.25	-0.0460836706252049	0.125993080115548	0
84.5	-0.0462639659312586	0.126576089589242	0
84.75	-0.0464437526187844	0.127157391665558	0
85	-0.046623031337922	0.127736994943353	0
85.25	-0.0468018027535066	0.128314907958431	0
85.5	-0.0469800675446789	0.128891139184143	0
85.75	-0.047157826404503	0.129465697031981	0
86	-0.0473350800395943	0.130038589852168	0
86.25	-0.0475118291697531	0.130609825934243	0
86.5	-0.047688074527608	0.131179413507635	0
86.75	-0.0478638168582676	0.131747360742228	0
87	-0.0480390569189773	0.13231367574893	0
87.25	-0.0482137954953119	0.132878366590501	0
87.5	-0.0483880341941482	0.133441441775599	0
87.75	-0.0485617757776193	0.134002910467259	0
88	-0.0487350230742676	0.134562781806287	0

## Sheet: FEF25-75%_males
Lookup tables
	age	Mspline	Sspline	Lspline				Coefficients to be used with lookup tables for Mspline, Sspline and Lspline (4-88 years)
	4	0.0908553995377819	0.0712704439233676	-3.05311331771918e-16				Coefficients
	4.25	0.0673009122669566	0.0872552320575315	-3.05311331771918e-16				Intercept	a0 -7.3353	p0 -2.1431	q0 0.01683
	4.5	0.0450931509502723	0.102326091189369	-3.05311331771918e-16				Height	a1 1.5977	/	/
	4.75	0.0240864108334318	0.116581900976112	-2.77555756156289e-16				Age	a2 0.1511	p1 0.3183	q1 0.07775
	5	0.00415780663625664	0.130101933078086	-2.77555756156289e-16				Splines	Mspline	Sspline	Lspline
	5.25	-0.0147457644612272	0.142507707020249	-2.77555756156289e-16
	5.5	-0.0326047450927902	0.153283121849581	-2.4980018054066e-16
	5.75	-0.0493742524150189	0.162157287031039	-2.77555756156289e-16				L = q0 + q1*ln(Age) + Lspline
	6	-0.0646383919368141	0.168869711884644	-2.77555756156289e-16				M = exp(a0 + a1*ln(Height) + a2*ln(Age) + Mspline)
	6.25	-0.0779042370994576	0.173208039646386	-2.4980018054066e-16				S = exp(p0 + p1*ln(Age) + Sspline)
	6.5	-0.0888030215496105	0.175031485076589	-2.4980018054066e-16				LLN (5th percentile) = exp(ln(1 - 1.645*L*S)/L +ln(M))
	6.75	-0.0972687285129705	0.174357186234963	-2.4980018054066e-16
	7	-0.103666589827734	0.171425052831881	-2.4980018054066e-16				Age in years with > 1 decimals
	7.25	-0.108354941873261	0.166471586436627	-2.4980018054066e-16				Height in cm, with one decimal
	7.5	-0.111636247984212	0.159704031490846	-2.4980018054066e-16
	7.75	-0.113763105703077	0.151334466490446	-2.22044604925031e-16				For 4-88 years:
	8	-0.114941469400939	0.141618913333239	-2.4980018054066e-16				Linearly interpolate Mspline , Sspline and Lspline for appropriate age (e.g. 4.3 yr) from look-up tables
	8.25	-0.115345953282875	0.130787900927174	-2.4980018054066e-16
	8.5	-0.115126097245541	0.119039755340371	-2.22044604925031e-16
	8.75	-0.114410931864567	0.106543017711765	-2.22044604925031e-16
	9	-0.113330329232727	0.0933766563069882	-2.22044604925031e-16
	9.25	-0.112015856972319	0.0795398186163472	-2.4980018054066e-16
	9.5	-0.110581083173658	0.0650317824006836	-2.22044604925031e-16
	9.75	-0.109123154569818	0.0498553702054398	-2.22044604925031e-16
	10	-0.107725171920205	0.0340162074890054	-2.22044604925031e-16
	10.25	-0.10642745678534	0.0175658106814058	-2.22044604925031e-16
	10.5	-0.105152658756323	0.000709960199686055	-2.22044604925031e-16
	10.75	-0.103808242437823	-0.0163353373634849	-2.22044604925031e-16
	11	-0.102314293345517	-0.0333819626789142	-2.22044604925031e-16
	11.25	-0.100601855817793	-0.050266104624819	-2.22044604925031e-16
	11.5	-0.0986115156690053	-0.0668451983331895	-2.22044604925031e-16
	11.75	-0.0962880813939533	-0.0829913254598147	-1.94289029309402e-16
	12	-0.0935453203490662	-0.0985559008238344	-1.94289029309402e-16
	12.25	-0.0902876142371429	-0.113389473246597	-1.94289029309402e-16
	12.5	-0.0864318501435468	-0.127361895798634	-2.22044604925031e-16
	12.75	-0.0819061682430249	-0.140360276028384	-2.22044604925031e-16
	13	-0.0766486379372724	-0.152286962007054	-1.94289029309402e-16
	13.25	-0.0706060990065192	-0.163057778169355	-1.94289029309402e-16
	13.5	-0.0637350441499756	-0.172602004391885	-2.22044604925031e-16
	13.75	-0.0560594027422274	-0.180908211654774	-1.94289029309402e-16
	14	-0.0476735995270241	-0.188026155518362	-1.94289029309402e-16
	14.25	-0.0386680113079736	-0.194006316356441	-1.94289029309402e-16
	14.5	-0.0291251887563071	-0.198896417851817	-1.94289029309402e-16
	14.75	-0.0191205788030029	-0.202741616205078	-1.94289029309402e-16
	15	-0.00872317229299924	-0.205584673587955	-1.94289029309402e-16
	15.25	0.00200391433804814	-0.207466117457527	-1.94289029309402e-16
	15.5	0.0130029188429752	-0.208424384606483	-1.94289029309402e-16
	15.75	0.0242123727658683	-0.208503028750205	-1.94289029309402e-16
	16	0.0355416334536249	-0.207771466407874	-1.94289029309402e-16
	16.25	0.0468993826593875	-0.206301308281649	-1.66533453693773e-16
	16.5	0.0582023910727969	-0.204158962135044	-1.94289029309402e-16
	16.75	0.0693748171556345	-0.20140604923692	-1.94289029309402e-16
	17	0.0803475747383429	-0.198099781083442	-1.66533453693773e-16
	17.25	0.0910577595477369	-0.194293302613642	-1.66533453693773e-16
	17.5	0.101448128651251	-0.190036005707255	-1.94289029309402e-16
	17.75	0.111466627520418	-0.185373816480923	-1.66533453693773e-16
	18	0.121065962769357	-0.180349475491776	-1.66533453693773e-16
	18.25	0.130204394389206	-0.175009645421266	-1.66533453693773e-16
	18.5	0.138846505617856	-0.169411668126607	-1.66533453693773e-16
	18.75	0.146960577467716	-0.163610430964788	-1.66533453693773e-16
	19	0.154517994461114	-0.157656832739097	-1.66533453693773e-16
	19.25	0.161492987448938	-0.151598041329531	-1.94289029309402e-16
	19.5	0.167862407072906	-0.145477781141146	-1.66533453693773e-16
	19.75	0.173605513511737	-0.139336580833652	-1.66533453693773e-16
	20	0.178703784206196	-0.133212003491658	-1.66533453693773e-16
	20.25	0.183140737528593	-0.127138858528013	-1.66533453693773e-16
	20.5	0.186901770975911	-0.121149397019093	-1.66533453693773e-16
	20.75	0.189973998464592	-0.115273498999161	-1.66533453693773e-16
	21	0.192352893652765	-0.10953543723839	-1.66533453693773e-16
	21.25	0.194068844703553	-0.103940640946356	-1.66533453693773e-16
	21.5	0.195161574205678	-0.0984886178113706	-1.66533453693773e-16
	21.75	0.19566866984776	-0.0931787882679804	-1.66533453693773e-16
	22	0.195625720227223	-0.088010489969212	-1.66533453693773e-16
	22.25	0.195066433252663	-0.0829829859009845	-1.66533453693773e-16
	22.5	0.194022746551032	-0.0780954718185241	-1.11022302462516e-16
	22.75	0.192524930489669	-0.07334708306258	-1.11022302462516e-16
	23	0.190601684372156	-0.0687369008100804	-1.66533453693773e-16
	23.25	0.188280226320864	-0.0642639578063848	-1.66533453693773e-16
	23.5	0.185586377313606	-0.0599272436244602	-1.66533453693773e-16
	23.75	0.182544639808894	-0.0557257094888595	-1.66533453693773e-16
	24	0.179178271310447	-0.0516582727225905	-1.66533453693773e-16
	24.25	0.17551135591471	-0.04772272597993	-1.66533453693773e-16
	24.5	0.171580096845659	-0.0439096026250891	-1.66533453693773e-16
	24.75	0.167424175867136	-0.0402069371312443	-1.66533453693773e-16
	25	0.163081098236689	-0.0366033909462997	-1.66533453693773e-16
	25.25	0.158586297405388	-0.0330882273219495	-1.66533453693773e-16
	25.5	0.153973250515486	-0.0296512782327105	-1.66533453693773e-16
	25.75	0.149273586773695	-0.0262829133223597	-1.66533453693773e-16
	26	0.144517189196928	-0.0229740107363123	-1.66533453693773e-16
	26.25	0.139732290184956	-0.0197159297094665	-1.66533453693773e-16
	26.5	0.134945561337619	-0.0165004847932024	-2.22044604925031e-16
	26.75	0.130182197897972	-0.0133199216139366	-1.66533453693773e-16
	27	0.125465998197551	-0.0101668940498405	-1.66533453693773e-16
	27.25	0.120819438407166	-0.00703444275232923	-1.66533453693773e-16
	27.5	0.116263742926743	-0.00391597490632867	-1.66533453693773e-16
	27.75	0.11181895150583	-0.000805244974115604	-1.66533453693773e-16
	28	0.107502799579846	0.00230339979771998	-1.66533453693773e-16
	28.25	0.103319039769282	0.00541242017579058	-1.66533453693773e-16
	28.5	0.0992631282934333	0.00852235601304763	-1.66533453693773e-16
	28.75	0.0953305698571594	0.0116336896844838	-1.66533453693773e-16
	29	0.0915170375524017	0.0147468760494582	-1.66533453693773e-16
	29.25	0.0878183655437743	0.017862343893658	-1.66533453693773e-16
	29.5	0.0842305421149812	0.0209804972837029	-1.66533453693773e-16
	29.75	0.0807497030652815	0.0241017168507853	-1.66533453693773e-16
	30	0.0773721254345823	0.0272263609991916	-1.66533453693773e-16
	30.25	0.0740942215363427	0.0303547670508586	-1.11022302462516e-16
	30.5	0.0709125332831766	0.0334872523258507	-1.66533453693773e-16
	30.75	0.0678237267882587	0.0366241151651987	-1.66533453693773e-16
	31	0.0648245872257407	0.039765635897967	-1.66533453693773e-16
	31.25	0.0619120139394074	0.0429120777544851	-1.66533453693773e-16
	31.5	0.0590830157809252	0.0460636877341771	-1.66533453693773e-16
	31.75	0.056334706670305	0.0492206974247137	-1.66533453693773e-16
	32	0.0536643013624021	0.0523833237773432	-1.66533453693773e-16
	32.25	0.0510691515403385	0.0555518021691959	-1.66533453693773e-16
	32.5	0.0485447308399989	0.0587247670305353	-1.11022302462516e-16
	32.75	0.0460822661581082	0.0618973473569231	-1.11022302462516e-16
	33	0.0436724341332315	0.0650641478711245	-1.66533453693773e-16
	33.25	0.0413063507872726	0.0682200495215546	-1.11022302462516e-16
	33.5	0.0389755106686369	0.071360163597486	-1.11022302462516e-16
	33.75	0.0366717708827702	0.0744798218589824	-1.66533453693773e-16
	34	0.0343873357297433	0.0775745670196041	-1.11022302462516e-16
	34.25	0.0321147420772396	0.0806401436929726	-1.66533453693773e-16
	34.5	0.0298468454110417	0.0836724897610542	-1.11022302462516e-16
	34.75	0.027576806529364	0.08666772814566	-1.11022302462516e-16
	35	0.0252980788459958	0.0896221589596706	-1.66533453693773e-16
	35.25	0.0230043962751907	0.0925322520217056	-1.66533453693773e-16
	35.5	0.0206897616620392	0.0953946397109502	-1.66533453693773e-16
	35.75	0.0183484357358958	0.0982061101456327	-1.11022302462516e-16
	36	0.0159749265617473	0.100963600678732	-1.66533453693773e-16
	36.25	0.0135639794580786	0.103664191676379	-1.66533453693773e-16
	36.5	0.0111105673644305	0.106305100582195	-1.66533453693773e-16
	36.75	0.00860988163335463	0.108883676243532	-1.11022302462516e-16
	37	0.00605732322983155	0.111397393491718	-1.66533453693773e-16
	37.25	0.00344849559562821	0.113843848145323	-1.66533453693773e-16
	37.5	0.000779990375566086	0.116220868204948	-1.66533453693773e-16
	37.75	-0.00194632756621438	0.118527137225035	-1.11022302462516e-16
	38	-0.00472664094703834	0.120761704961138	-1.66533453693773e-16
	38.25	-0.00755725778035021	0.122923680059136	-1.66533453693773e-16
	38.5	-0.0104346138141951	0.125012226537242	-1.11022302462516e-16
	38.75	-0.0133552672049246	0.127026561539038	-1.66533453693773e-16
	39	-0.0163158943019024	0.128965953064342	-1.66533453693773e-16
	39.25	-0.0193132854580602	0.13082971780174	-1.66533453693773e-16
	39.5	-0.0223443409950441	0.132617219078696	-1.11022302462516e-16
	39.75	-0.0254060673163901	0.134327864880358	-1.11022302462516e-16
	40	-0.0284955731827861	0.135961105965994	-1.11022302462516e-16
	40.25	-0.0316100661308498	0.137516434060862	-1.66533453693773e-16
	40.5	-0.0347468490284779	0.138993380128116	-1.11022302462516e-16
	40.75	-0.0379033167692562	0.14039151271105	-1.66533453693773e-16
	41	-0.0410769530883321	0.141710436347821	-1.11022302462516e-16
	41.25	-0.044265327505598	0.142949790051324	-1.11022302462516e-16
	41.5	-0.0474660923821792	0.144109245854424	-1.66533453693773e-16
	41.75	-0.0506769800907083	0.14518850741485	-1.66533453693773e-16
	42	-0.0538958002916337	0.14618730867969	-1.66533453693773e-16
	42.25	-0.0571204373089262	0.147105412604358	-1.11022302462516e-16
	42.5	-0.0603488476175551	0.147942609922329	-1.66533453693773e-16
	42.75	-0.0635790576353736	0.148698717838413	-1.11022302462516e-16
	43	-0.0668091584653565	0.149373580585967	-1.11022302462516e-16
	43.25	-0.0700373038472675	0.149967068227125	-1.11022302462516e-16
	43.5	-0.0732610931717188	0.150479430465454	-1.11022302462516e-16
	43.75	-0.0764773170944899	0.150911441267221	-1.11022302462516e-16
	44	-0.0796828012919732	0.15126390975717	-1.11022302462516e-16
	44.25	-0.0828744800434329	0.151537635714129	-1.11022302462516e-16
	44.5	-0.0860493929365971	0.151733409511791	-1.11022302462516e-16
	44.75	-0.0892046813684395	0.151852012256456	-1.66533453693773e-16
	45	-0.0923375851993882	0.151894215901707	-1.11022302462516e-16
	45.25	-0.0954454395504483	0.151860783354483	-1.66533453693773e-16
	45.5	-0.0985256717065175	0.151752468581727	-1.11022302462516e-16
	45.75	-0.101575798132732	0.151570016716633	-1.66533453693773e-16
	46	-0.104593421595442	0.151314164162606	-1.66533453693773e-16
	46.25	-0.107576228383378	0.150985638698667	-1.11022302462516e-16
	46.5	-0.110521985626811	0.150585159585051	-1.11022302462516e-16
	46.75	-0.113428538709157	0.150113437665419	-1.11022302462516e-16
	47	-0.116293808770364	0.149571175470347	-1.11022302462516e-16
	47.25	-0.119115790292668	0.148959067319741	-1.11022302462516e-16
	47.5	-0.12189254877123	0.148277799422642	-1.11022302462516e-16
	47.75	-0.124622218472373	0.147528049986715	-1.11022302462516e-16
	48	-0.12730300024418	0.146710489298346	-1.11022302462516e-16
	48.25	-0.129933159439907	0.145825779850822	-1.11022302462516e-16
	48.5	-0.132511023869	0.144874576412428	-1.11022302462516e-16
	48.75	-0.1350349818549	0.143857526149296	-1.11022302462516e-16
	49	-0.137503480334777	0.142775268704041	-1.11022302462516e-16
	49.25	-0.139915023022526	0.141628436298729	-1.66533453693773e-16
	49.5	-0.142268168438137	0.140417653845127	-1.11022302462516e-16
	49.75	-0.144561530450625	0.139143538879273	-1.11022302462516e-16
	50	-0.146793770065042	0.137806702111642	-1.11022302462516e-16
	50.25	-0.148964105457221	0.136407711724503	-1.11022302462516e-16
	50.5	-0.15107306910323	0.134947040382181	-1.11022302462516e-16
	50.75	-0.153121390060416	0.133425143416779	-1.11022302462516e-16
	51	-0.155109786506187	0.131842473325068	-1.11022302462516e-16
	51.25	-0.15703896548231	0.130199479787165	-1.11022302462516e-16
	51.5	-0.158909623130324	0.12849660963235	-1.11022302462516e-16
	51.75	-0.160722444903898	0.126734306823935	-1.11022302462516e-16
	52	-0.162478105769945	0.124913012435894	-1.66533453693773e-16
	52.25	-0.164177270420764	0.12303316464098	-1.11022302462516e-16
	52.5	-0.165820593468538	0.121095198692243	-1.11022302462516e-16
	52.75	-0.167408719641481	0.119099546913936	-1.11022302462516e-16
	53	-0.168942283971923	0.11704663868931	-1.11022302462516e-16
	53.25	-0.170421911983332	0.114936900449872	-1.11022302462516e-16
	53.5	-0.171848219870562	0.112770755671905	-1.11022302462516e-16
	53.75	-0.173221814677162	0.110548624868095	-1.11022302462516e-16
	54	-0.17454329446627	0.108270925584147	-1.11022302462516e-16
	54.25	-0.175813248490701	0.10593807239665	-1.11022302462516e-16
	54.5	-0.177032257359272	0.10355047691204	-1.11022302462516e-16
	54.75	-0.17820089319461	0.101108547763477	-1.11022302462516e-16
	55	-0.179319719792843	0.0986126906159909	-1.11022302462516e-16
	55.25	-0.180389292776746	0.0960633081680771	-1.11022302462516e-16
	55.5	-0.181410159746344	0.0934608001539351	-1.11022302462516e-16
	55.75	-0.182382860426178	0.0908055633471377	-5.55111512312578e-17
	56	-0.183307926807186	0.088097991568413	-1.11022302462516e-16
	56.25	-0.184185883290096	0.0853384756901246	-1.11022302462516e-16
	56.5	-0.185017246936441	0.0825274037420853	-1.11022302462516e-16
	56.75	-0.18580252757835	0.0796651608975956	-1.11022302462516e-16
	57	-0.186542226874458	0.0767521285778888	-1.11022302462516e-16
	57.25	-0.187236839554145	0.073788685400069	-5.55111512312578e-17
	57.5	-0.187886850912253	0.0707752049753441	-1.11022302462516e-16
	57.75	-0.188492700747455	0.0677120254883483	-1.11022302462516e-16
	58	-0.18905503817632	0.0645996639008164	-1.11022302462516e-16
	58.25	-0.189574623799409	0.061438733587493	-1.11022302462516e-16
	58.5	-0.190052586616305	0.0582301603109506	-1.11022302462516e-16
	58.75	-0.190490035423115	0.0549748553359476	-1.11022302462516e-16
	59	-0.190888042342465	0.0516737014990505	-5.55111512312578e-17
	59.25	-0.191247657376087	0.0483275653713275	-1.11022302462516e-16
	59.5	-0.191569908897	0.0449372975957959	-1.11022302462516e-16
	59.75	-0.191855804144156	0.0415037332324285	-1.11022302462516e-16
	60	-0.192106329694348	0.0380276920856073	-1.11022302462516e-16
	60.25	-0.192322451925605	0.034509979025483	-1.11022302462516e-16
	60.5	-0.192505117469864	0.0309513843000095	-1.11022302462516e-16
	60.75	-0.192655253649275	0.0273526838421544	-1.11022302462516e-16
	61	-0.192773768905268	0.0237146395675792	-1.11022302462516e-16
	61.25	-0.192861553216602	0.0200379996652849	-1.11022302462516e-16
	61.5	-0.192919478506479	0.0163234988814396	-5.55111512312578e-17
	61.75	-0.192948399038475	0.0125718587969899	-1.11022302462516e-16
	62	-0.192949151804291	0.00878378809751368	-1.11022302462516e-16
	62.25	-0.192922556899465	0.00495998283684573	-1.11022302462516e-16
	62.5	-0.192869417892987	0.00110112669620499	-5.55111512312578e-17
	62.75	-0.192790522186621	-0.00279210876385616	-1.11022302462516e-16
	63	-0.192686641361735	-0.00671906386095689	-1.11022302462516e-16
	63.25	-0.192558531524183	-0.0106790905474976	-1.11022302462516e-16
	63.5	-0.192406933635684	-0.014671552177402	-1.11022302462516e-16
	63.75	-0.192232573838844	-0.0186958232773365	-1.11022302462516e-16
	64	-0.192036163774975	-0.022751289323769	-1.11022302462516e-16
	64.25	-0.19181840089486	-0.0268373465261035	-1.11022302462516e-16
	64.5	-0.191579968755875	-0.0309534016070292	-1.11022302462516e-16
	64.75	-0.19132153732075	-0.0350988716003484	-1.11022302462516e-16
	65	-0.191043763246476	-0.0392731836489932	-5.55111512312578e-17
	65.25	-0.190747290163119	-0.0434757748021117	-1.11022302462516e-16
	65.5	-0.19043274899989	-0.0477060914876406	-1.11022302462516e-16
	65.75	-0.190100758109247	-0.0519635902048167	-1.11022302462516e-16
	66	-0.189751923535506	-0.0562477373129013	-1.11022302462516e-16
	66.25	-0.189386839474282	-0.0605580076064393	-1.11022302462516e-16
	66.5	-0.18900608956471	-0.0648938778809717	-5.55111512312578e-17
	66.75	-0.188610240457063	-0.069254866766716	-1.11022302462516e-16
	67	-0.188199857108064	-0.0736404443359944	-5.55111512312578e-17
	67.25	-0.187775515748868	-0.0780499556240067	-5.55111512312578e-17
	67.5	-0.187337829970562	-0.0824824655415802	-1.11022302462516e-16
	67.75	-0.186887415069565	-0.0869369736611878	-5.55111512312578e-17
	68	-0.18642487127835	-0.0914125158395913	-1.11022302462516e-16
	68.25	-0.185950787034267	-0.0959081457483107	-1.11022302462516e-16
	68.5	-0.185465739380914	-0.100422933559452	-5.55111512312578e-17
	68.75	-0.184970293681721	-0.104955968728191	-5.55111512312578e-17
	69	-0.184465004020918	-0.109506358627363	-1.11022302462516e-16
	69.25	-0.183950413452782	-0.114073228065157	-1.11022302462516e-16
	69.5	-0.183427054237943	-0.118655718872638	-5.55111512312578e-17
	69.75	-0.182895448041505	-0.123252989682408	-1.11022302462516e-16
	70	-0.182356106150795	-0.127864215557532	-1.11022302462516e-16
	70.25	-0.181809529687617	-0.132488587661246	-5.55111512312578e-17
	70.5	-0.181256209817874	-0.137125312945352	-1.11022302462516e-16
	70.75	-0.18069662794192	-0.1417736138137	-1.11022302462516e-16
	71	-0.180131255897155	-0.146432727829912	-5.55111512312578e-17
	71.25	-0.179560556148423	-0.151101907417133	-1.11022302462516e-16
	71.5	-0.178984981973427	-0.155780419559604	-5.55111512312578e-17
	71.75	-0.178404977647727	-0.160467545515607	-1.11022302462516e-16
	72	-0.177820978623062	-0.165162580537404	-5.55111512312578e-17
	72.25	-0.177233411702562	-0.169864833597977	-5.55111512312578e-17
	72.5	-0.176642695213677	-0.174573627118787	-1.11022302462516e-16
	72.75	-0.176049239168481	-0.179288296709258	-1.11022302462516e-16
	73	-0.175453445431648	-0.184008190912052	-1.11022302462516e-16
	73.25	-0.174855707889144	-0.188732670942437	-1.11022302462516e-16
	73.5	-0.174256412598547	-0.193461110445773	-5.55111512312578e-17
	73.75	-0.17365593793674	-0.198192895261541	-1.11022302462516e-16
	74	-0.173054654753551	-0.202927423184202	-1.11022302462516e-16
	74.25	-0.172452926519997	-0.207664103731743	-1.11022302462516e-16
	74.5	-0.171851109474018	-0.212402357918075	-5.55111512312578e-17
	74.75	-0.171249552758087	-0.217141618035198	-1.11022302462516e-16
	75	-0.170648598556582	-0.221881327436473	-5.55111512312578e-17
	75.25	-0.17004858223124	-0.226620940323852	-5.55111512312578e-17
	75.5	-0.169449832488823	-0.23135992151401	-5.55111512312578e-17
	75.75	-0.168852671440709	-0.236097746286769	-5.55111512312578e-17
	76	-0.168257414299434	-0.240833900468419	-1.11022302462516e-16
	76.25	-0.167664366443954	-0.245567882268245	-5.55111512312578e-17
	76.5	-0.167073811561642	-0.25029921003274	-1.11022302462516e-16
	76.75	-0.166486074736169	-0.255027380280416	-5.55111512312578e-17
	77	-0.165901480809342	-0.259751895223737	-5.55111512312578e-17
	77.25	-0.165320346437479	-0.264472267935928	-5.55111512312578e-17
	77.5	-0.164742889579553	-0.269188082292366	-1.11022302462516e-16
	77.75	-0.16416918589888	-0.273899021793058	-1.11022302462516e-16
	78	-0.163599298074827	-0.278604783684052	-5.55111512312578e-17
	78.25	-0.163033264787009	-0.283305085869881	-1.11022302462516e-16
	78.5	-0.162470960945354	-0.287999760385423	-1.11022302462516e-16
	78.75	-0.161912307847786	-0.292688617951742	-1.11022302462516e-16
	79	-0.161357240518948	-0.297371458715807	-1.11022302462516e-16
	79.25	-0.160805691959553	-0.302048086923499	-5.55111512312578e-17
	79.5	-0.160257596203409	-0.30671831078702	-1.11022302462516e-16
	79.75	-0.159712888299995	-0.311381942411126	-5.55111512312578e-17
	80	-0.159171504297315	-0.316038797720851	-5.55111512312578e-17
	80.25	-0.15863338122506	-0.320688696390694	-5.55111512312578e-17
	80.5	-0.158098457707769	-0.325331464014401	-5.55111512312578e-17
	80.75	-0.157566678355658	-0.329966947708966	-1.11022302462516e-16
	81	-0.157037991032319	-0.334595006388034	-5.55111512312578e-17
	81.25	-0.156512343378811	-0.339215498165046	-1.11022302462516e-16
	81.5	-0.15598966648306	-0.343828218611906	-5.55111512312578e-17
	81.75	-0.155469877945844	-0.348432912343335	-5.55111512312578e-17
	82	-0.15495289635414	-0.353029327730532	-1.11022302462516e-16
	82.25	-0.15443866457715	-0.357617305644542	-1.11022302462516e-16
	82.5	-0.153927177001427	-0.362196883222349	-5.55111512312578e-17
	82.75	-0.153418434718118	-0.366768123115659	-1.11022302462516e-16
	83	-0.152912438637904	-0.371331087252273	-1.11022302462516e-16
	83.25	-0.1524091894949	-0.375885836845975	-5.55111512312578e-17
	83.5	-0.151908669802944	-0.380432363594699	-5.55111512312578e-17
	83.75	-0.151410795068213	-0.384970403659278	-5.55111512312578e-17
	84	-0.150915466529694	-0.389499638747808	-1.11022302462516e-16
	84.25	-0.150422587035183	-0.39401975664324	-5.55111512312578e-17
	84.5	-0.149932061014362	-0.398530451096468	-1.11022302462516e-16
	84.75	-0.149443794452375	-0.403031421721447	-5.55111512312578e-17
	85	-0.148957694863896	-0.407522373892319	-5.55111512312578e-17
	85.25	-0.148473671267687	-0.412003018642499	-1.11022302462516e-16
	85.5	-0.147991634161615	-0.416473072565681	-5.55111512312578e-17
	85.75	-0.147511495498139	-0.420932257718715	-5.55111512312578e-17
	86	-0.147033168660255	-0.425380301526331	-5.55111512312578e-17
	86.25	-0.146556568437863	-0.429816936687658	-5.55111512312578e-17
	86.5	-0.146081611004592	-0.434241901084495	-1.11022302462516e-16
	86.75	-0.145608213895037	-0.438654937691329	-5.55111512312578e-17
	87	-0.145136295982413	-0.443055794487019	-5.55111512312578e-17
	87.25	-0.144665778014277	-0.447444226846793	-5.55111512312578e-17
	87.5	-0.144196609362319	-0.451820116448049	-5.55111512312578e-17
	87.75	-0.1437287792818	-0.456183521325919	-5.55111512312578e-17
	88	-0.143262280156367	-0.460534512517381	-5.55111512312578e-17

## Sheet: FEV1_females
	age	Mspline	Sspline	Lspline
	4	-0.330057368789255	0.40768883982471	0			Coefficients to be used with lookup tables for Mspline, Sspline and Lspline (4-88 years)
	4.25	-0.313405449283911	0.383231393417512	0			Coefficients
	4.5	-0.297705831414266	0.360172226804738	0			Intercept	a0 - 9.28335	p0 -2.13844	q0 1
	4.75	-0.282900497172234	0.338345780159324	0			Height	a1 2.02198	/
	5	-0.269026275339273	0.317584738870902	0			Age	a2 - 0.04603	p1 0.11464	q1 0
	5.25	-0.256066901568161	0.297748651114189	0			Splines	Mspline	Sspline	Lspline
	5.5	-0.24387497522034	0.27869663100353	0
	5.75	-0.232308351344313	0.26030041993497	0
	6	-0.221247970486198	0.242456055661292	0			L = q0 + q1*ln(Age) + Lspline = 1
	6.25	-0.210535284165843	0.225084867477956	0			M = exp(a0 + a1*ln(Height) + a2*ln(Age) + Mspline)
	6.5	-0.199995785009623	0.208126704119153	0			S = exp(p0 + p1*ln(Age) + Sspline)
	6.75	-0.189489732657741	0.191531274957962	0			LLN (5th percentile) = exp(ln(1 - 1.645*L*S)/L +ln(M))
	7	-0.178924295587604	0.17525464912319	0
	7.25	-0.168390370630911	0.159245743483518	0			Age in years with > 1 decimals
	7.5	-0.158048796007586	0.143454447630772	0			Height in cm
	7.75	-0.148030186588011	0.12783889984076	0
	8	-0.13843922597589	0.112364312141511	0			For 4-88 years:
	8.25	-0.129318840352811	0.097028061977269	0			Linearly interpolate Mspline , Sspline and Lspline for appropriate age (e.g. 4.3 yr) from look-up tables
	8.5	-0.120622290017055	0.0818792884538335	0
	8.75	-0.112299036472248	0.0669642879254324	0
	9	-0.104304848321821	0.0523209128571962	0
	9.25	-0.0966009297671242	0.0379799286964069	0
	9.5	-0.0891354808221259	0.023975153569757	0
	9.75	-0.08179707000021	0.0103678183465721	0
	10	-0.0744743378542907	-0.00278331742391091	0
	10.25	-0.0670718765323031	-0.0154296240239193	0
	10.5	-0.0595080069881	-0.0275311148300461	0
	10.75	-0.0517128824500226	-0.0390551930838396	0
	11	-0.0436416747815063	-0.0499769517436734	0
	11.25	-0.0353283481397959	-0.0602833490128549	0
	11.5	-0.026825551837744	-0.0699670077577077	0
	11.75	-0.0181800502442382	-0.0790233850882114	0
	12	-0.0094334119349444	-0.0874503502437227	0
	12.25	-0.000622601123950517	-0.0952478223714968	0
	12.5	0.00821950546592731	-0.102417459854037	0
	12.75	0.0170588717217903	-0.108963807123707	0
	13	0.0258344879435946	-0.114901559932077	0
	13.25	0.0344800823147242	-0.12024886234477	0
	13.5	0.0429368336300975	-0.125023296741109	0
	13.75	0.0511526096416866	-0.129241881099786	0
	14	0.0590812598402533	-0.132921079564969	0
	14.25	0.0666819887377432	-0.136076814628617	0
	14.5	0.0739187995519579	-0.138724480516851	0
	14.75	0.0807613414087278	-0.140879466169396	0
	15	0.0872039091413104	-0.142564540578252	0
	15.25	0.0932584782405481	-0.143807376170702	0
	15.5	0.0989370294035314	-0.144633995723252	0
	15.75	0.104251069542915	-0.14506872505128	0
	16	0.109211654801527	-0.145134323494325	0
	16.25	0.11382941188897	-0.144852102561181	0
	16.5	0.118114558293682	-0.144242034111873	0
	16.75	0.122076921423185	-0.143322849122145	0
	17	0.125725956778469	-0.142112128045597	0
	17.25	0.12907194788256	-0.140628268579217	0
	17.5	0.132129732616226	-0.138896474643997	0
	17.75	0.134914627885566	-0.136942305912291	0
	18	0.137441057707697	-0.134789531768987	0
	18.25	0.139722614149367	-0.132460265089799	0
	18.5	0.141772113454373	-0.129975084838222	0
	18.75	0.143601647769048	-0.127353148493861	0
	19	0.145222632867313	-0.124612295267746	0
	19.25	0.146645852221967	-0.121769140942696	0
	19.5	0.147881497748617	-0.118839165109611	0
	19.75	0.148939207452898	-0.115836791481646	0
	20	0.149827605207498	-0.112775524304654	0
	20.25	0.150551103267787	-0.109668423714967	0
	20.5	0.151112239464426	-0.106527877919454	0
	20.75	0.151513528547865	-0.103365431542692	0
	21	0.151757466976152	-0.100191842086292	0
	21.25	0.151846530818295	-0.0970171330037692	0
	21.5	0.151783173467674	-0.093850642901524	0
	21.75	0.151569823673409	-0.0907010711250991	0
	22	0.151208883846754	-0.0875765200232264	0
	22.25	0.150702728617684	-0.0844845341640013	0
	22.5	0.15005370360881	-0.0814321367396729	0
	22.75	0.149264124415245	-0.0784258633979715	0
	23	0.148336275752312	-0.0754717936810549	0
	23.25	0.147273192396979	-0.0725751658059197	0
	23.5	0.146084401218504	-0.0697373587758681	0
	23.75	0.144782215790569	-0.0669578823701547	0
	24	0.143378301952133	-0.0642362217784329	0
	24.25	0.141883689464226	-0.0615718533548275	0
	24.5	0.140308808130968	-0.0589642459411841	0
	24.75	0.138663521641762	-0.056412862090264	0
	25	0.136957159281206	-0.0539171591784309	0
	25.25	0.135198545666542	-0.0514765904279932	0
	25.5	0.133396028643178	-0.0490906058383507	0
	25.75	0.131557505469969	-0.0467586530376747	0
	26	0.129690447412987	-0.0444801780635233	0
	26.25	0.127801922850081	-0.042254626070668	0
	26.5	0.125898618995665	-0.040081441982422	0
	26.75	0.123986862329083	-0.0379600710793802	0
	27	0.122072569003633	-0.0358899031666808	0
	27.25	0.120160245085913	-0.033869439260964	0
	27.5	0.118253285927775	-0.0318965233122948	0
	27.75	0.116354878981028	-0.0299690690109349	0
	28	0.114468039057527	-0.0280850766382452	0
	28.25	0.112595617267031	-0.0262426290231088	0
	28.5	0.110740309456926	-0.0244398877222864	0
	28.75	0.108904664175416	-0.0226750893998111	0
	29	0.107091090189661	-0.0209465423950803	0
	29.25	0.105301863589753	-0.0192526234732058	0
	29.5	0.103539134502229	-0.0175917747439596	0
	29.75	0.101804933433499	-0.0159625007354793	0
	30	0.100101177268224	-0.0143633656167472	0
	30.25	0.0984296749518432	-0.0127929905709634	0
	30.5	0.0967921328540289	-0.0112500512836975	0
	30.75	0.0951901598622893	-0.00973327557468573	0
	31	0.0936252721705682	-0.0082414411318501	0
	31.25	0.0920989208933616	-0.00677337103230369	0
	31.5	0.0906115055735377	-0.00532803235866064	0
	31.75	0.0891590118400067	-0.00390487630521741	0
	32	0.0877360786167607	-0.00250352508063845	0
	32.25	0.086337594222563	-0.00112360835053815	0
	32.5	0.0849586733391359	0.000235235741433026	0
	32.75	0.083594645271015	0.00157336064644098	0
	33	0.0822410445912674	0.00289111165558231	0
	33.25	0.0808936022249416	0.00418882615242833	0
	33.5	0.0795482369710356	0.00546683383749258	0
	33.75	0.0782010474165933	0.00672545695951055	0
	34	0.0768483042376502	0.00796501053154164	0
	34.25	0.0754864428632356	0.00918580253715162	0
	34.5	0.074112056475343	0.0103881341371419	0
	34.75	0.0727218893385135	0.0115722998630814	0
	35	0.0713128304395578	0.0127385878015502	0
	35.25	0.0698819074092114	0.0138872797831959	0
	35.5	0.0684262807316252	0.0150186515510611	0
	35.75	0.066943238294499	0.0161329729358333	0
	36	0.0654301898086942	0.0172305080094544	0
	36.25	0.0638846655475298	0.0183115153576363	0
	36.5	0.0623043050990599	0.0193762480393316	0
	36.75	0.0606875481147391	0.0204249748376713	0
	37	0.0590339014365977	0.0214579886489923	0
	37.25	0.0573429992435948	0.0224755782179404	0
	37.5	0.0556144990101259	0.0234780252333346	0
	37.75	0.0538480845057396	0.0244656046657741	0
	38	0.0520434639688183	0.0254385849492393	0
	38.25	0.0502003690120905	0.0263972281761746	0
	38.5	0.048318553577138	0.0273417902831874	0
	38.75	0.0463977929333055	0.0282725212333073	0
	39	0.0444378827235088	0.0291896651890851	0
	39.25	0.0424386380528059	0.0300934606794625	0
	39.5	0.0403998926033768	0.0309841407785605	0
	39.75	0.0383214978339659	0.0318619332205259	0
	40	0.0362033221394498	0.0327270606065155	0
	40.25	0.0340452501217605	0.0335797405087777	0
	40.5	0.0318471818477377	0.0344201856299788	0
	40.75	0.0296090321562161	0.0352486039342386	0
	41	0.0273307299899468	0.0360651987815965	0
	41.25	0.0250122177590768	0.0368701690538449	0
	41.5	0.0226534507292584	0.0376637092802832	0
	41.75	0.0202543964428159	0.0384460097506534	0
	42	0.0178150341509458	0.0392172566383686	0
	42.25	0.0153353541122314	0.039977632095626	0
	42.5	0.0128153563967768	0.0407273143336404	0
	42.75	0.01025608098454	0.0414665296952967	0
	43	0.00765968897402836	0.0421955568739434	0
	43.25	0.00502845831790388	0.0429146763928594	0
	43.5	0.0023645750436323	0.0436241601896998	0
	43.75	-0.000329841263612352	0.0443242730163911	0
	44	-0.00305273542557849	0.0450152726509354	0
	44.25	-0.00580211463280733	0.0456974100951202	0
	44.5	-0.00857604649990051	0.0463709297925294	0
	44.75	-0.0113726571604609	0.047036069805432	0
	45	-0.0141901294518352	0.0476930620123881	0
	45.25	-0.0170267011487901	0.0483421322831956	0
	45.5	-0.0198806632674913	0.0489835006586095	0
	45.75	-0.0227503584197404	0.0496173815139425	0
	46	-0.0256341792295238	0.0502439837246222	0
	46.25	-0.0285305668031786	0.0508635108257267	0
	46.5	-0.0314380092486015	0.051476161162022	0
	46.75	-0.0343550402467034	0.0520821280363752	0
	47	-0.0372802376727179	0.0526815998552237	0
	47.25	-0.0402122222564643	0.0532747602598307	0
	47.5	-0.0431496563005496	0.0538617882700034	0
	47.75	-0.0460912424184077	0.054442858394842	0
	48	-0.04903572236557	0.0550181408037189	0
	48.25	-0.0519818758359598	0.0555878013999438	0
	48.5	-0.0549285193201303	0.0561520019206967	0
	48.75	-0.0578745050758709	0.0567109001265658	0
	49	-0.0608187200268855	0.0572646498534497	0
	49.25	-0.0637600848013875	0.0578134011254547	0
	49.5	-0.0666975651280008	0.0583572969288848	0
	49.75	-0.0696304731080133	0.0588963921273677	0
	50	-0.072558475450748	0.0594306511018186	0
	50.25	-0.075481264307788	0.0599600360217214	0
	50.5	-0.0783985417170214	0.0604845108790049	0
	50.75	-0.0813100190663931	0.0610040415101578	0
	51	-0.0842154168198537	0.0615185955230986	0
	51.25	-0.0871144642324868	0.0620281422116458	0
	51.5	-0.0900068991654788	0.0625326525799603	0
	51.75	-0.0928924677677312	0.0630320992050386	0
	52	-0.095770924271779	0.0635264562246274	0
	52.25	-0.0986420307617824	0.0640156992855425	0
	52.5	-0.101505556932477	0.0644998054750419	0
	52.75	-0.104361279896018	0.0649787533011845	0
	53	-0.107208983956896	0.0654525226307832	0
	53.25	-0.110048460405572	0.0659210946414044	0
	53.5	-0.112879507336073	0.0663844517975594	0
	53.75	-0.115701929424622	0.0668425777742039	0
	54	-0.118515537791266	0.0672954574718136	0
	54.25	-0.121320149765824	0.0677430769156899	0
	54.5	-0.124115588757093	0.0681854232698917	0
	54.75	-0.126901684042249	0.0686224847513159	0
	55	-0.129678270652214	0.069054250656319	0
	55.25	-0.13244518916707	0.0694807112710523	0
	55.5	-0.135202285583906	0.0699018578668977	0
	55.75	-0.137949411157322	0.0703176826559289	0
	56	-0.140686422260851	0.0707281787717859	0
	56.25	-0.143413180242469	0.0711333402336976	0
	56.5	-0.146129551285515	0.0715331619158694	0
	56.75	-0.148835406270576	0.0719276395168595	0
	57	-0.151530620661548	0.0723167695456732	0
	57.25	-0.154215074369333	0.0727005492806505	0
	57.5	-0.156888641630593	0.073078975154913	0
	57.75	-0.159551290777818	0.0734520586747687	0
	58	-0.162203217821144	0.0738198477238465	0
	58.25	-0.164844660468027	0.0741823968905528	0
	58.5	-0.167475879702465	0.074539764511685	0
	58.75	-0.170097121523455	0.0748920065639105	0
	59	-0.172708626779684	0.075239178231195	0
	59.25	-0.175310631267632	0.0755813339145546	0
	59.5	-0.177903365837455	0.0759185272396801	0
	59.75	-0.18048705652622	0.0762508110887279	0
	60	-0.183061924657606	0.0765782375997297	0
	60.25	-0.185628186936665	0.0769008581679114	0
	60.5	-0.18818605557755	0.0772187234856319	0
	60.75	-0.190735738392819	0.0775318835397432	0
	61	-0.193277438893922	0.0778403876260239	0
	61.25	-0.195811356388852	0.0781442843627354	0
	61.5	-0.198337686074343	0.0784436216995426	0
	61.75	-0.200856619131576	0.0787384469346455	0
	62	-0.203368342810466	0.0790288067191729	0
	62.25	-0.205873040519451	0.0793147470717501	0
	62.5	-0.208370891910803	0.0795963133897881	0
	62.75	-0.21086207296328	0.0798735504598136	0
	63	-0.213346756062988	0.0801465024679298	0
	63.25	-0.215825110084678	0.0804152130130014	0
	63.5	-0.218297300459779	0.0806797251059719	0
	63.75	-0.220763489261325	0.080940081191714	0
	64	-0.223223835274236	0.0811963231551494	0
	64.25	-0.225678494064542	0.0814484923280248	0
	64.5	-0.228127618049763	0.0816966294991683	0
	64.75	-0.230571356566413	0.0819407749232126	0
	65	-0.233009855940402	0.0821809683338315	0
	65.25	-0.235443259538592	0.0824172489430122	0
	65.5	-0.237871800735666	0.0826496301834212	0
	65.75	-0.240295665320462	0.082878137202663	0
	66	-0.242714916567726	0.083102827194715	0
	66.25	-0.245129616647905	0.0833237564350007	0
	66.5	-0.247539826656467	0.0835409802958524	0
	66.75	-0.249945606635476	0.0837545532635247	0
	67	-0.252347015594667	0.0839645289548332	0
	67.25	-0.254744111532027	0.0841709601334297	0
	67.5	-0.257136951453912	0.0843738987257199	0
	67.75	-0.259525591394704	0.0845733958364334	0
	68	-0.261910083892136	0.084769502455609	0
	68.25	-0.264290266620277	0.0849623269577098	0
	68.5	-0.266665916549844	0.0851519932051648	0
	68.75	-0.269036958084353	0.0853385839560228	0
	69	-0.271403310853438	0.0855221822791659	0
	69.25	-0.273764896537923	0.0857028697158562	0
	69.5	-0.276121638814409	0.085880726311431	0
	69.75	-0.278473463292396	0.0860558306475856	0
	70	-0.28082029749678	0.0862282598674269	0
	70.25	-0.283162070842147	0.0863980897111207	0
	70.5	-0.285498714595583	0.0865653945303593	0
	70.75	-0.287830161807758	0.086730247311561	0
	71	-0.290156347294561	0.0868927197160529	0
	71.25	-0.292477207589789	0.0870528821004695	0
	71.5	-0.294792680913682	0.087210803544479	0
	71.75	-0.297102707131225	0.0873665518689122	0
	72	-0.299407227720211	0.087520193665527	0
	72.25	-0.301706185735815	0.0876717943192244	0
	72.5	-0.303999525776538	0.0878214180309538	0
	72.75	-0.306287193951102	0.0879691278403054	0
	73	-0.308569137846073	0.0881149856476209	0
	73.25	-0.31084530649423	0.088259052235631	0
	73.5	-0.313115650343654	0.0884013872906275	0
	73.75	-0.315380121227502	0.0885420494231912	0
	74	-0.317638672334446	0.0886810961884754	0
	74.25	-0.319891258179833	0.0888185841060674	0
	74.5	-0.322137834577436	0.0889545686794575	0
	74.75	-0.324378358611854	0.0890891044150426	0
	75	-0.3266127886115	0.0892222448407425	0
	75.25	-0.328841084122216	0.0893540425242187	0
	75.5	-0.331063205881305	0.0894845490905234	0
	75.75	-0.333279115792386	0.0896138152396631	0
	76	-0.335488776900792	0.0897418907639054	0
	76.25	-0.337692153368554	0.0898688245672135	0
	76.5	-0.339889210198088	0.0899946648041958	0
	76.75	-0.342079913903792	0.0901194585395959	0
	77	-0.34426423237125	0.0902432518579004	0
	77.25	-0.346442133879142	0.0903660903237995	0
	77.5	-0.348613577386466	0.0904880237033567	0
	77.75	-0.350778541016458	0.0906090921209579	0
	78	-0.352937012849567	0.0907293305455386	0
	78.25	-0.355088981589175	0.0908487733328742	0
	78.5	-0.357234444665027	0.0909674502867366	0
	78.75	-0.35937342755167	0.0910853772627236	0
	79	-0.36150596149122	0.0912025670125616	0
	79.25	-0.363632077519293	0.0913190320951753	0
	79.5	-0.365751806466593	0.0914347848799293	0
	79.75	-0.36786517896048	0.0915498375498083	0
	80	-0.369972225421815	0.0916642021068919	0
	80.25	-0.372072972649647	0.0917778920475816	0
	80.5	-0.374167446070192	0.0918909215028436	0
	80.75	-0.376255673038335	0.0920033028535154	0
	81	-0.378337680563845	0.0921150480153972	0
	81.25	-0.380413497454425	0.0922261712522106	0
	81.5	-0.382483155266085	0.0923366904221952	0
	81.75	-0.384546680132244	0.0924466163517503	0
	82	-0.386604097496726	0.0925559589852141	0
	82.25	-0.388655432678526	0.0926647281208537	0
	82.5	-0.390700710872155	0.092772933413239	0
	82.75	-0.392739957147969	0.0928805843755791	0
	83	-0.394773196452535	0.0929876903820113	0
	83.25	-0.396800453608973	0.0930942606698477	0
	83.5	-0.398821753317341	0.0932003043417826	0
	83.75	-0.40083712015501	0.093305830368059	0
	84	-0.402846578577046	0.0934108475885909	0
	84.25	-0.404850152916625	0.0935153647150544	0
	84.5	-0.406847867385427	0.0936193903329348	0
	84.75	-0.408839746074051	0.0937229329035372	0
	85	-0.410825812952437	0.0938260007659628	0
	85.25	-0.412806091870729	0.0939286021396062	0
	85.5	-0.414780607976375	0.0940307469644852	0
	85.75	-0.416749390826764	0.0941324509418471	0
	86	-0.41871247066965	0.0942337307084846	0
	86.25	-0.420669877516348	0.0943346026352223	0
	86.5	-0.422621641144195	0.0944350828312754	0
	86.75	-0.42456779109896	0.0945351871485274	0
	87	-0.426508356697241	0.0946349311857297	0
	87.25	-0.428443367028816	0.0947343302926247	0
	87.5	-0.430372850958987	0.0948333995739945	0
	87.75	-0.432296837130856	0.094932153893637	0
	88	-0.434215353967621	0.0950306078782677	0
	88.25	-0.436128429724528	0.0951287756980854	0
	88.5	-0.438036093729377	0.0952266655107497	0
	88.75	-0.439938376446392	0.0953242791881734	0
	89	-0.441835308150099	0.0954216182838639	0

## Sheet: FVC_females
Lookup tables
	age	Mspline	Sspline	Lspline
	4	-0.290101795060417	0.442721102061712	0			Coefficients to be used with lookup tables for Mspline, Sspline and Lspline (4-88 years)
	4.25	-0.275954830143503	0.414475104858586	0			Coefficients
	4.5	-0.262616896914649	0.387844000044414	0			Intercept	a0 -9.60440	p0 -2.05119	q0 1
	4.75	-0.250035793352261	0.362639282766346	0			Height	a1 2.07793	/	/
	5	-0.23823478444853	0.33867516328961	0			Age	a2 0.01009	p1 0.09020	q1 0
	5.25	-0.227189815277905	0.315794723610985	0			Splines	Mspline	Sspline	Lspline
	5.5	-0.216744905321383	0.293840122884178	0
	5.75	-0.206748531497157	0.272667914097205	0
	6	-0.197079059172156	0.25216204216906	0			L = q0 + q1*ln(Age) + Lspline = 1
	6.25	-0.18761669833045	0.232246573429614	0			M = exp(a0 + a1*ln(Height) + a2*ln(Age) + Mspline)
	6.5	-0.178248674639098	0.212872644265386	0			S = exp(p0 + p1*ln(Age) + Sspline)
	6.75	-0.168885394166642	0.193998006308285	0			LLN (5th percentile) = exp(ln(1 - 1.645*L*S)/L +ln(M))
	7	-0.159470168578208	0.175587457968924	0
	7.25	-0.150087217830764	0.157627930218054	0			Age in years with > 1 decimals
	7.5	-0.140873067409197	0.140115704120603	0			Height in cm
	7.75	-0.131938502224543	0.123045150367117	0
	8	-0.12337233101829	0.106409219134292	0			For 4-88 years:
	8.25	-0.115216998840863	0.0902128789387018	0			Linearly interpolate Mspline , Sspline and Lspline for appropriate age (e.g. 4.3 yr) from look-up tables
	8.5	-0.107449609714628	0.0744836300013623	0
	8.75	-0.100042481706497	0.0592450552044266	0
	9	-0.0929705901217588	0.0445145540318268	0
	9.25	-0.0862112701967739	0.0303044301310773	0
	9.5	-0.0797212138947856	0.0166264409209071	0
	9.75	-0.073377143597348	0.00350203395909188	0
	10	-0.0670529943913181	-0.00904948024114471	0
	10.25	-0.0606407215962097	-0.0210137944603517	0
	10.5	-0.0540477903089833	-0.0323808050186742	0
	10.75	-0.0471950357380333	-0.0431439424029059	0
	11	-0.0400312858303593	-0.0532996742333802	0
	11.25	-0.0325930819648068	-0.0628472784665695	0
	11.5	-0.0249378764867476	-0.071788173773643	0
	11.75	-0.0171167161782684	-0.0801254712459845	0
	12	-0.00917499219532658	-0.0878636912381512	0
	12.25	-0.0011530834575364	-0.0950085226134834	0
	12.5	0.00691308099919219	-0.101566617771605	0
	12.75	0.0149874838764052	-0.107546514015922	0
	13	0.0230121393481024	-0.112964295431886	0
	13.25	0.0309253285921542	-0.117838422048594	0
	13.5	0.0386722518925868	-0.122186644403868	0
	13.75	0.0462043192605925	-0.126026022785942	0
	14	0.0534784946335716	-0.129372954775292	0
	14.25	0.060456714678125	-0.132243202259647	0
	14.5	0.0671053728426543	-0.134651917794007	0
	14.75	0.0733960706142458	-0.136614123710829	0
	15	0.0793227396894096	-0.138151307264605	0
	15.25	0.0848953509029577	-0.13928922325598	0
	15.5	0.0901239658490027	-0.140052061681145	0
	15.75	0.095018296772464	-0.140462413953976	0
	16	0.0995877199880795	-0.14054139679433	0
	16.25	0.103841288524677	-0.140308764825205	0
	16.5	0.107787744412175	-0.13978301318554	0
	16.75	0.111435530589812	-0.138981471162366	0
	17	0.11479280244836	-0.13792038780252	0
	17.25	0.11786804258416	-0.136616531920211	0
	17.5	0.120671964992821	-0.135092037175011	0
	17.75	0.123215437644744	-0.133369204660329	0
	18	0.125508784795423	-0.131468779372736	0
	18.25	0.127561820568179	-0.129410066294566	0
	18.5	0.129383880071558	-0.12721103678275	0
	18.75	0.130983848246359	-0.124888426141297	0
	19	0.132370186641028	-0.122457823207394	0
	19.25	0.133550958282106	-0.119933752675022	0
	19.5	0.134533850803324	-0.117329750826269	0
	19.75	0.135326197975566	-0.11465843524502	0
	20	0.135935055728261	-0.11193148286053	0
	20.25	0.136367585942029	-0.109159126857185	0
	20.5	0.136630813096383	-0.10635061308095	0
	20.75	0.136731434441861	-0.103514568062216	0
	21	0.136675837617776	-0.100659042065955	0
	21.25	0.13647011785962	-0.0977915477674702	0
	21.5	0.136120094129641	-0.0949190959858737	0
	21.75	0.135631324197339	-0.092048228806439	0
	22	0.135009118746602	-0.0891850502994194	0
	22.25	0.134258554585649	-0.0863352550351864	0
	22.5	0.133384487020129	-0.0835041545630977	0
	22.75	0.132391561460606	-0.0806967020312954	0
	23	0.131284224305116	-0.0779175150700817	0
	23.25	0.130067383934552	-0.0751706305117728	0
	23.5	0.128751201501224	-0.0724575656434048	0
	23.75	0.127348015255981	-0.0697786003157805	0
	24	0.125869489833763	-0.0671339654173835	0
	24.25	0.124326634125989	-0.0645238549108302	0
	24.5	0.122729838981583	-0.061948428458042	0
	24.75	0.121088912511356	-0.0594078138742404	0
	25	0.119413113153424	-0.056902109403359	0
	25.25	0.117711180666488	-0.0544313858402694	0
	25.5	0.115991365190022	-0.0519956885023083	0
	25.75	0.114261454509551	-0.0495950390658579	0
	26	0.112528799651962	-0.0472294372800464	0
	26.25	0.110800338919775	-0.0448988625583884	0
	26.5	0.109082620478112	-0.0426032754685108	0
	26.75	0.107381823583847	-0.040342619115753	0
	27	0.105703650976533	-0.0381167883652078	0
	27.25	0.104051460680985	-0.0359251566647969	0
	27.5	0.102426807088174	-0.0337667087561895	0
	27.75	0.100831101554093	-0.0316404549990092	0
	28	0.0992656653879003	-0.0295454417340073	0
	28.25	0.0977317347482298	-0.027480749707707	0
	28.5	0.0962304652626944	-0.0254454925862937	0
	28.75	0.0947629363791087	-0.0234388155415632	0
	29	0.0933301554669352	-0.0214598939063635	0
	29.25	0.0919330616875467	-0.0195079319008971	0
	29.5	0.0905725296462645	-0.0175821614225709	0
	29.75	0.0892493728365817	-0.0156818408915256	0
	30	0.0879643468917717	-0.0138062541519408	0
	30.25	0.0867181526628915	-0.0119547094377843	0
	30.5	0.0855114391144838	-0.0101265383695701	0
	30.75	0.0843448060756131	-0.00832109501830969	0
	31	0.0832188068086843	-0.00653775499848486	0
	31.25	0.0821339720351943	-0.00477591156770907	0
	31.5	0.0810898850089234	-0.00303510607235813	0
	31.75	0.0800820332506689	-0.00131547320527603	0
	32	0.0791046774177744	0.000382665610450417	0
	32.25	0.0781523435223193	0.00205901391667673	0
	32.5	0.0772197999680948	0.00371329738010306	0
	32.75	0.0763020452237058	0.00534526245008848	0
	33	0.075394297792684	0.0069546753119909	0
	33.25	0.0744919866553584	0.00854132091305582	0
	33.5	0.073590742178169	0.0101050020160949	0
	33.75	0.0726863874455539	0.0116455383182508	0
	34	0.0717749300055797	0.0131627656066231	0
	34.25	0.0708525540044445	0.0146565349538657	0
	34.5	0.0699156126824416	0.0161267119625803	0
	34.75	0.0689606212223719	0.0175731760409579	0
	35	0.0679842499300189	0.0189958197116988	0
	35.25	0.0669833177187957	0.0203945479669958	0
	35.5	0.0659547859007095	0.0217692776398932	0
	35.75	0.0648957523398757	0.0231199368310384	0
	36	0.0638034454847034	0.0244464642981459	0
	36.25	0.0626752228262575	0.0257488095277922	0
	36.5	0.0615085591627071	0.0270269311988283	0
	36.75	0.0603017522267937	0.0282809081481437	0
	37	0.0590541954360351	0.0295109824368109	0
	37.25	0.0577654172678717	0.0307174089401769	0
	37.5	0.0564349747400605	0.0319004388971067	0
	37.75	0.0550624562829114	0.0330603206105815	0
	38	0.053647479688264	0.0341972993666879	0
	38.25	0.0521896908142931	0.0353116174634769	0
	38.5	0.0506887623477716	0.0364035142374783	0
	38.75	0.0491443926192403	0.0374732260944382	0
	39	0.0475563044727618	0.0385209865375868	0
	39.25	0.045924244185894	0.0395470261962365	0
	39.5	0.0442479804249629	0.0405515728742056	0
	39.75	0.0425273032859863	0.0415348515348191	0
	40	0.0407620233116752	0.042497084392912	0
	40.25	0.0389519706165302	0.0434384909000021	0
	40.5	0.0370969940106232	0.0443592877958026	0
	40.75	0.0351969601759858	0.0452596891338453	0
	41	0.0332517528740173	0.0461399063161549	0
	41.25	0.0312612721891874	0.0470001481232243	0
	41.5	0.0292254338026936	0.0478406207485962	0
	41.75	0.0271441683030211	0.0486615278239302	0
	42	0.0250174205134748	0.04946307045928	0
	42.25	0.0228451486918182	0.0502454472528506	0
	42.5	0.02062732325005	0.0510088542760974	0
	42.75	0.0183649383674886	0.051753566422142	0
	43	0.0160600916523332	0.0524799438805044	0
	43.25	0.0137149977056392	0.0531883529638135	0
	43.5	0.0113317829774022	0.0538791496946178	0
	43.75	0.00891251070844312	0.0545526818820232	0
	44	0.00645918284638825	0.0552092893442657	0
	44.25	0.00397374196687039	0.0558493041184258	0
	44.5	0.00145807310847168	0.0564730506924751	0
	44.75	-0.00108599443123936	0.0570808461935988	0
	45	-0.00365668538256791	0.0576730005989843	0
	45.25	-0.00625227683731211	0.0582498169228451	0
	45.5	-0.00887109664778585	0.0588115914088898	0
	45.75	-0.0115115218735617	0.0593586137057074	0
	46	-0.0141719772863471	0.0598911670446618	0
	46.25	-0.0168509339251735	0.0604095284116828	0
	46.5	-0.0195469076979506	0.0609139687088218	0
	46.75	-0.0222584580318266	0.0614047529147188	0
	47	-0.0249841865703573	0.0618821402419041	0
	47.25	-0.0277227359076999	0.0623463842790348	0
	47.5	-0.0304727883764393	0.0627977331469227	0
	47.75	-0.033233064855434	0.0632364296191175	0
	48	-0.0360023236622631	0.063662711307561	0
	48.25	-0.0387793594171448	0.0640768107436611	0
	48.5	-0.0415630019636737	0.0644789554880483	0
	48.75	-0.0443521153909074	0.0648693683364172	0
	49	-0.0471455969939143	0.0652482673779464	0
	49.25	-0.0499423763501419	0.0656158661275561	0
	49.5	-0.0527414225903762	0.0659723724078807	0
	49.75	-0.0555419437789855	0.0663179584603082	0
	50	-0.0583433921087835	0.0666527601464746	0
	50.25	-0.061145245508671	0.0669769096333661	0
	50.5	-0.0639469970871751	0.0672905369496726	0
	50.75	-0.0667481545401856	0.067593770068018	0
	51	-0.069548239734976	0.0678867349339058	0
	51.25	-0.0723467882916307	0.0681695554760606	0
	51.5	-0.075143349257603	0.0684423537333965	0
	51.75	-0.0779374846696825	0.0687052498030509	0
	52	-0.0807287692214462	0.0689583619216896	0
	52.25	-0.0835167899107248	0.0692018065010505	0
	52.5	-0.0863011456835103	0.0694356981425566	0
	52.75	-0.0890814471242987	0.0696601497020946	0
	53	-0.091857316122514	0.0698752723068281	0
	53.25	-0.0946283855594494	0.0700811753843511	0
	53.5	-0.0973942990200651	0.0702779667159747	0
	53.75	-0.100154710474319	0.0704657524308041	0
	54	-0.102909284035215	0.0706446370959919	0
	54.25	-0.105657693635978	0.0708147236808285	0
	54.5	-0.108399622801656	0.0709761136417337	0
	54.75	-0.111134764353764	0.0711289068975123	0
	55	-0.11386282020236	0.0712732019250559	0
	55.25	-0.116583501062308	0.0714090957263682	0
	55.5	-0.119296526236029	0.071536683886716	0
	55.75	-0.122001623375223	0.0716560605869327	0
	56	-0.124698528263623	0.0717673186428314	0
	56.25	-0.127386984597395	0.0718705495232757	0
	56.5	-0.130066743772717	0.0719658433733654	0
	56.75	-0.132737564677464	0.0720532890356234	0
	57	-0.135399213504803	0.0721329740886152	0
	57.25	-0.138051463550882	0.0722049848536257	0
	57.5	-0.1406940876797	0.0722694043126235	0
	57.75	-0.143326931546241	0.0723263332300781	0
	58	-0.145950011668218	0.0723759184035986	0
	58.25	-0.148563378666239	0.0724183134417911	0
	58.5	-0.151167103637764	0.0724536749052038	0
	58.75	-0.153761249955062	0.0724821542702812	0
	59	-0.156345880409896	0.0725039000509611	0
	59.25	-0.158921057205074	0.0725190578581871	0
	59.5	-0.161486841953264	0.0725277704565812	0
	59.75	-0.164043295700328	0.0725301778469816	0
	60	-0.166590478923331	0.0725264173112863	0
	60.25	-0.169128451526284	0.0725166234589627	0
	60.5	-0.171657272867053	0.0725009283141913	0
	60.75	-0.174177001752987	0.0724794613554387	0
	61	-0.17668769644845	0.0724523495725551	0
	61.25	-0.17918941468206	0.0724197175219154	0
	61.5	-0.181682213651147	0.072381687375449	0
	61.75	-0.184166150031354	0.072338378977495	0
	62	-0.186641279978167	0.0722899098869956	0
	62.25	-0.189107659135118	0.0722363954296634	0
	62.5	-0.191565342639977	0.0721779487456902	0
	62.75	-0.194014385130327	0.0721146808355337	0
	63	-0.196454840749336	0.0720467006049768	0
	63.25	-0.198886763153606	0.0719741149123052	0
	63.5	-0.201310205510982	0.0718970285995104	0
	63.75	-0.203725220514803	0.0718155445473001	0
	64	-0.206131860386872	0.0717297637121221	0
	64.25	-0.208530176880926	0.0716397851632233	0
	64.5	-0.210920221288632	0.0715457061227311	0
	64.75	-0.213302044444449	0.0714476220033844	0
	65	-0.21567569673436	0.0713456264503782	0
	65.25	-0.218041228092442	0.0712398113667847	0
	65.5	-0.22039870534558	0.0711302537819893	0
	65.75	-0.222748186545378	0.0710170354464388	0
	66	-0.225089706953218	0.0709002534183607	0
	66.25	-0.227423301702874	0.0707800029305559	0
	66.5	-0.229749005800061	0.0706563774266262	0
	66.75	-0.232066854120738	0.0705294685973361	0
	67	-0.234376881409499	0.070399366416134	0
	67.25	-0.236679122278051	0.0702661591738578	0
	67.5	-0.238973611203791	0.0701299335126475	0
	67.75	-0.241260382528434	0.0699907744590811	0
	68	-0.243539469981952	0.0698487658169913	0
	68.25	-0.245810867229741	0.0697040201515322	0
	68.5	-0.248074556643049	0.0695566569849011	0
	68.75	-0.250330548131966	0.069406773327227	0
	69	-0.252578850741282	0.0692544652793832	0
	69.25	-0.254819473917465	0.0690998270973429	0
	69.5	-0.257052427493546	0.0689429512294673	0
	69.75	-0.25927772167211	0.0687839283532117	0
	70	-0.261495367020222	0.0686228474097197	0
	70.25	-0.263705374466355	0.0684597956475392	0
	70.5	-0.265907755285285	0.0682948586440437	0
	70.75	-0.268102521075134	0.0681281203314765	0
	71	-0.270289683761961	0.0679596630450183	0
	71.25	-0.272469255580972	0.067789567548344	0
	71.5	-0.274641249071607	0.0676179130672121	0
	71.75	-0.276805677062944	0.0674447773131177	0
	72	-0.278962552667544	0.0672702365184714	0
	72.25	-0.281111889271539	0.0670943654641263	0
	72.5	-0.283253700525536	0.0669172375074625	0
	72.75	-0.28538800033591	0.0667389246100467	0
	73	-0.287514802856283	0.066559497364693	0
	73.25	-0.289634122479287	0.0663790250219352	0
	73.5	-0.291745973828487	0.0661975755159354	0
	73.75	-0.293850371750551	0.0660152154898299	0
	74	-0.295947331307605	0.0658320103205385	0
	74.25	-0.298036867769802	0.0656480241430457	0
	74.5	-0.3001189966081	0.0654633198742043	0
	74.75	-0.302193733487176	0.0652779592359585	0
	75	-0.304261094258575	0.065092002778085	0
	75.25	-0.306321094953981	0.0649055099004523	0
	75.5	-0.308373751778605	0.0647185388745801	0
	75.75	-0.310419081104865	0.0645311468650853	0
	76	-0.312457099466311	0.0643433899508059	0
	76.25	-0.314487823551065	0.0641553231484575	0
	76.5	-0.316511270007219	0.0639670005866495	0
	76.75	-0.318527455954705	0.0637784750796293	0
	77	-0.32053639889376	0.0635897982588989	0
	77.25	-0.322538115984386	0.0634010211557086	0
	77.5	-0.324532616804094	0.0632122001482402	0
	77.75	-0.326519924628021	0.0630233795237227	0
	78	-0.328500069564718	0.0628345971280095	0
	78.25	-0.330473081596315	0.0626458900866458	0
	78.5	-0.332438996638857	0.0624572898432847	0
	78.75	-0.334397870976023	0.0622688103245554	0
	79	-0.336349764635751	0.0620804615980002	0
	79.25	-0.338294736939233	0.0618922535380442	0
	79.5	-0.34023284651138	0.0617041958295321	0
	79.75	-0.342164151291097	0.0615162979711976	0
	80	-0.344088708537946	0.061328569282018	0
	80.25	-0.346006572292128	0.0611410210094343	0
	80.5	-0.347917795814435	0.0609536652103566	0
	80.75	-0.349822431692344	0.0607665118662144	0
	81	-0.351720530670377	0.0605795704743972	0
	81.25	-0.353612154658892	0.0603928530065123	0
	81.5	-0.355497382497559	0.060206375219352	0
	81.75	-0.357376260679425	0.0600201454851255	0
	82	-0.35924883187019	0.0598341712555102	0
	82.25	-0.361115138315792	0.0596484598354003	0
	82.5	-0.362975221847812	0.0594630183855513	0
	82.75	-0.364829123888802	0.0592778539251737	0
	83	-0.366676885457528	0.0590929733344729	0
	83.25	-0.368518547174116	0.0589083833571427	0
	83.5	-0.370354149265133	0.0587240906028088	0
	83.75	-0.372183731568576	0.058540101549426	0
	84	-0.374007333538801	0.0583564225456268	0
	84.25	-0.375824994251341	0.0581730598130277	0
	84.5	-0.3776367524077	0.0579900194484888	0
	84.75	-0.379442646340012	0.0578073074263303	0
	85	-0.381242714015686	0.0576249296005082	0
	85.25	-0.383036993044522	0.057442891707332	0
	85.5	-0.384825529212058	0.0572612012998037	0
	85.75	-0.386608395220581	0.0570798719945174	0
	86	-0.3883856682975	0.0568989183997859	0
	86.25	-0.390157424617216	0.0567183548528916	0
	86.5	-0.391923739317292	0.0565381954247444	0
	86.75	-0.393684686514401	0.0563584539244482	0
	87	-0.395440339319968	0.0561791439037844	0
	87.25	-0.397190769855507	0.0560002786616152	0
	87.5	-0.39893604926775	0.0558218712481979	0
	87.75	-0.400676247743458	0.0556439344694259	0
	88	-0.402411434524005	0.0554664808909873	0
	88.25	-0.404141677218092	0.0552895225772725	0
	88.5	-0.405867024344836	0.0551130644920748	0
	88.75	-0.407587504477455	0.0549371041736462	0
	89	-0.409303144997116	0.0547616388216052	0

## Sheet: FEV1FVC ratio_females
Lookup tables
	age	Mspline	Sspline	Lspline
	4	-0.0295872	0.0708178	0		Coefficients to be used with lookup tables for Mspline, Sspline and Lspline (4-88 years)
	4.25	-0.0284324	0.0672226	0		Coefficients
	4.5	-0.0273437	0.0638329	0		Intercept	a0 0.293300	p0 - 3.50154	q0 1
	4.75	-0.0263128	0.0606244	0		Height	a1 - 0.049001	/
	5	-0.0253307	0.0575722	0		Age	a2 - 0.057819	p1 0.26631	q1 0
	5.25	-0.02439	0.0546554	0		Splines	Mspline	Sspline	Lspline
	5.5	-0.0234825	0.0518522	0
	5.75	-0.0226007	0.0491425	0
	6	-0.0217383	0.0465102	0		L = q0 + q1*ln(Age) + Lspline =1
	6.25	-0.0208861	0.0439429	0		M = exp(a0 + a1*ln(Height) + a2*ln(Age) + Mspline)
	6.5	-0.0200335	0.0414309	0		S = exp(p0 + p1*ln(Age) + Sspline)
	6.75	-0.019172	0.0389664	0		LLN (5th percentile) = exp(ln(1 - 1.645*L*S)/L +ln(M))
	7	-0.0182954	0.0365433	0
	7.25	-0.0174003	0.0341622	0		Age in years with > 1 decimals
	7.5	-0.016485	0.0318264	0		Height in cm
	7.75	-0.0155486	0.0295382	0
	8	-0.0145901	0.0272994	0		For 4-88 years:
	8.25	-0.0136101	0.02511	0		Linearly interpolate Mspline , Sspline and Lspline for appropriate age (e.g. 4.3 yr) from look-up tables
	8.5	-0.0126108	0.0229677	0
	8.75	-0.0115946	0.0208701	0
	9	-0.0105632	0.0188149	0
	9.25	-0.0095187	0.0168003	0
	9.5	-0.00846366	0.0148245	0
	9.75	-0.00740493	0.012888	0
	10	-0.00634935	0.0109909	0
	10.25	-0.00530283	0.00913349	0
	10.5	-0.0042704	0.00731577	0
	10.75	-0.00325638	0.00553763	0
	11	-0.00226431	0.00379927	0
	11.25	-0.00129645	0.00210287	0
	11.5	-0.000354468	0.000450841	0
	11.75	0.000560233	-0.00115481	0
	12	0.00144651	-0.00271248	0
	12.25	0.00230343	-0.00422085	0
	12.5	0.00313025	-0.00567891	0
	12.75	0.00392638	-0.00708586	0
	13	0.00469132	-0.00844096	0
	13.25	0.00542472	-0.00974362	0
	13.5	0.00612631	-0.0109934	0
	13.75	0.00679592	-0.0121901	0
	14	0.00743349	-0.0133336	0
	14.25	0.00803901	-0.0144238	0
	14.5	0.00861254	-0.015461	0
	14.75	0.00915423	-0.0164453	0
	15	0.00966465	-0.0173776	0
	15.25	0.0101447	-0.0182593	0
	15.5	0.0105953	-0.0190919	0
	15.75	0.0110172	-0.0198764	0
	16	0.0114112	-0.0206143	0
	16.25	0.0117781	-0.0213067	0
	16.5	0.0121188	-0.0219549	0
	16.75	0.0124338	-0.0225599	0
	17	0.0127239	-0.0231229	0
	17.25	0.0129899	-0.023645	0
	17.5	0.0132329	-0.0241282	0
	17.75	0.0134538	-0.0245741	0
	18	0.0136539	-0.0249845	0
	18.25	0.0138341	-0.0253611	0
	18.5	0.0139952	-0.0257054	0
	18.75	0.0141383	-0.0260188	0
	19	0.0142641	-0.0263028	0
	19.25	0.0143734	-0.0265587	0
	19.5	0.014467	-0.0267876	0
	19.75	0.0145456	-0.0269908	0
	20	0.0146099	-0.0271695	0
	20.25	0.0146603	-0.0273245	0
	20.5	0.0146972	-0.0274569	0
	20.75	0.0147211	-0.0275675	0
	21	0.0147323	-0.0276571	0
	21.25	0.0147311	-0.0277265	0
	21.5	0.014718	-0.0277766	0
	21.75	0.0146932	-0.027808	0
	22	0.0146571	-0.0278214	0
	22.25	0.01461	-0.0278176	0
	22.5	0.0145522	-0.027797	0
	22.75	0.0144839	-0.0277605	0
	23	0.0144055	-0.0277085	0
	23.25	0.0143173	-0.0276415	0
	23.5	0.0142196	-0.02756	0
	23.75	0.0141128	-0.0274643	0
	24	0.0139973	-0.0273547	0
	24.25	0.0138735	-0.0272315	0
	24.5	0.0137417	-0.0270948	0
	24.75	0.0136023	-0.0269451	0
	25	0.0134556	-0.0267826	0
	25.25	0.013302	-0.0266076	0
	25.5	0.0131416	-0.0264203	0
	25.75	0.0129749	-0.0262209	0
	26	0.012802	-0.0260097	0
	26.25	0.0126233	-0.0257869	0
	26.5	0.012439	-0.0255529	0
	26.75	0.0122492	-0.0253077	0
	27	0.0120544	-0.0250516	0
	27.25	0.0118547	-0.0247849	0
	27.5	0.0116505	-0.024508	0
	27.75	0.0114421	-0.024221	0
	28	0.0112298	-0.0239245	0
	28.25	0.0110139	-0.0236185	0
	28.5	0.0107946	-0.0233035	0
	28.75	0.0105723	-0.0229797	0
	29	0.0103472	-0.0226474	0
	29.25	0.0101194	-0.0223067	0
	29.5	0.00988935	-0.0219581	0
	29.75	0.00965714	-0.0216016	0
	30	0.00942301	-0.0212376	0
	30.25	0.00918716	-0.0208662	0
	30.5	0.00894977	-0.0204877	0
	30.75	0.00871103	-0.0201023	0
	31	0.00847112	-0.0197101	0
	31.25	0.0082302	-0.0193115	0
	31.5	0.00798843	-0.0189066	0
	31.75	0.00774593	-0.0184956	0
	32	0.00750278	-0.0180788	0
	32.25	0.0072591	-0.0176565	0
	32.5	0.00701496	-0.0172289	0
	32.75	0.00677046	-0.0167963	0
	33	0.00652569	-0.0163589	0
	33.25	0.00628072	-0.015917	0
	33.5	0.00603564	-0.0154707	0
	33.75	0.00579051	-0.0150202	0
	34	0.00554541	-0.0145658	0
	34.25	0.0053004	-0.0141077	0
	34.5	0.00505556	-0.013646	0
	34.75	0.00481093	-0.0131809	0
	35	0.00456659	-0.0127127	0
	35.25	0.00432259	-0.0122414	0
	35.5	0.00407899	-0.0117672	0
	35.75	0.00383583	-0.0112903	0
	36	0.00359317	-0.0108109	0
	36.25	0.00335106	-0.010329	0
	36.5	0.00310953	-0.0098449	0
	36.75	0.00286865	-0.00935865	0
	37	0.00262844	-0.00887043	0
	37.25	0.00238894	-0.00838039	0
	37.5	0.00215021	-0.00788868	0
	37.75	0.00191226	-0.00739542	0
	38	0.00167514	-0.00690076	0
	38.25	0.00143888	-0.00640483	0
	38.5	0.00120351	-0.00590775	0
	38.75	0.000969066	-0.00540964	0
	39	0.00073557	-0.00491062	0
	39.25	0.000503052	-0.00441081	0
	39.5	0.00027154	-0.0039103	0
	39.75	4.10572e-05	-0.0034092	0
	40	-0.000188371	-0.00290763	0
	40.25	-0.000416722	-0.00240566	0
	40.5	-0.000643974	-0.00190341	0
	40.75	-0.000870107	-0.00140096	0
	41	-0.0010951	-0.000898389	0
	41.25	-0.00131893	-0.000395795	0
	41.5	-0.00154159	0.000106743	0
	41.75	-0.00176306	0.000609148	0
	42	-0.00198331	0.00111134	0
	42.25	-0.00220234	0.00161325	0
	42.5	-0.00242013	0.0021148	0
	42.75	-0.00263668	0.00261593	0
	43	-0.00285198	0.00311654	0
	43.25	-0.00306605	0.00361656	0
	43.5	-0.00327889	0.00411592	0
	43.75	-0.00349052	0.00461454	0
	44	-0.00370092	0.00511235	0
	44.25	-0.00391012	0.0056093	0
	44.5	-0.00411811	0.0061053	0
	44.75	-0.00432491	0.00660029	0
	45	-0.00453051	0.00709423	0
	45.25	-0.00473494	0.00758704	0
	45.5	-0.00493818	0.00807867	0
	45.75	-0.00514025	0.00856907	0
	46	-0.00534116	0.00905819	0
	46.25	-0.0055409	0.00954597	0
	46.5	-0.0057395	0.0100324	0
	46.75	-0.00593695	0.0105173	0
	47	-0.00613325	0.0110008	0
	47.25	-0.00632843	0.0114828	0
	47.5	-0.00652247	0.0119632	0
	47.75	-0.0067154	0.012442	0
	48	-0.00690721	0.0129191	0
	48.25	-0.00709791	0.0133946	0
	48.5	-0.0072875	0.0138683	0
	48.75	-0.00747601	0.0143403	0
	49	-0.00766342	0.0148105	0
	49.25	-0.00784974	0.0152789	0
	49.5	-0.00803499	0.0157455	0
	49.75	-0.00821918	0.0162102	0
	50	-0.00840231	0.016673	0
	50.25	-0.00858442	0.0171339	0
	50.5	-0.0087655	0.0175929	0
	50.75	-0.00894559	0.01805	0
	51	-0.0091247	0.0185052	0
	51.25	-0.00930284	0.0189585	0
	51.5	-0.00948003	0.0194099	0
	51.75	-0.00965627	0.0198593	0
	52	-0.0098316	0.0203068	0
	52.25	-0.010006	0.0207523	0
	52.5	-0.0101795	0.0211959	0
	52.75	-0.0103522	0.0216376	0
	53	-0.010524	0.0220773	0
	53.25	-0.0106949	0.022515	0
	53.5	-0.010865	0.0229508	0
	53.75	-0.0110342	0.0233846	0
	54	-0.0112027	0.0238164	0
	54.25	-0.0113703	0.0242463	0
	54.5	-0.0115372	0.0246742	0
	54.75	-0.0117032	0.0251001	0
	55	-0.0118686	0.0255241	0
	55.25	-0.0120331	0.0259461	0
	55.5	-0.0121969	0.0263661	0
	55.75	-0.01236	0.0267841	0
	56	-0.0125223	0.0272002	0
	56.25	-0.012684	0.0276142	0
	56.5	-0.0128449	0.0280263	0
	56.75	-0.0130052	0.0284364	0
	57	-0.0131647	0.0288446	0
	57.25	-0.0133236	0.0292508	0
	57.5	-0.0134818	0.029655	0
	57.75	-0.0136394	0.0300572	0
	58	-0.0137964	0.0304575	0
	58.25	-0.0139527	0.0308558	0
	58.5	-0.0141084	0.0312522	0
	58.75	-0.0142635	0.0316467	0
	59	-0.014418	0.0320393	0
	59.25	-0.0145719	0.03243	0
	59.5	-0.0147253	0.0328189	0
	59.75	-0.0148781	0.0332059	0
	60	-0.0150303	0.0335911	0
	60.25	-0.0151821	0.0339745	0
	60.5	-0.0153333	0.0343561	0
	60.75	-0.0154839	0.0347359	0
	61	-0.0156341	0.0351139	0
	61.25	-0.0157838	0.0354901	0
	61.5	-0.015933	0.0358646	0
	61.75	-0.0160818	0.0362374	0
	62	-0.01623	0.0366085	0
	62.25	-0.0163778	0.0369778	0
	62.5	-0.0165252	0.0373455	0
	62.75	-0.0166721	0.0377115	0
	63	-0.0168186	0.0380758	0
	63.25	-0.0169647	0.0384385	0
	63.5	-0.0171104	0.0387995	0
	63.75	-0.0172556	0.0391589	0
	64	-0.0174005	0.0395167	0
	64.25	-0.017545	0.0398729	0
	64.5	-0.0176891	0.0402275	0
	64.75	-0.0178328	0.0405806	0
	65	-0.0179761	0.040932	0
	65.25	-0.0181191	0.0412819	0
	65.5	-0.0182618	0.0416303	0
	65.75	-0.0184041	0.0419771	0
	66	-0.0185461	0.0423224	0
	66.25	-0.0186877	0.0426662	0
	66.5	-0.018829	0.0430085	0
	66.75	-0.01897	0.0433494	0
	67	-0.0191107	0.0436887	0
	67.25	-0.0192511	0.0440266	0
	67.5	-0.0193911	0.044363	0
	67.75	-0.0195309	0.044698	0
	68	-0.0196703	0.0450316	0
	68.25	-0.0198094	0.0453638	0
	68.5	-0.0199483	0.0456946	0
	68.75	-0.0200868	0.046024	0
	69	-0.020225	0.046352	0
	69.25	-0.0203628	0.0466787	0
	69.5	-0.0205004	0.047004	0
	69.75	-0.0206376	0.047328	0
	70	-0.0207745	0.0476507	0
	70.25	-0.0209111	0.0479721	0
	70.5	-0.0210473	0.0482922	0
	70.75	-0.0211832	0.048611	0
	71	-0.0213188	0.0489286	0
	71.25	-0.0214541	0.0492449	0
	71.5	-0.021589	0.0495599	0
	71.75	-0.0217236	0.0498738	0
	72	-0.0218579	0.0501864	0
	72.25	-0.0219918	0.0504978	0
	72.5	-0.0221254	0.050808	0
	72.75	-0.0222587	0.051117	0
	73	-0.0223916	0.0514248	0
	73.25	-0.0225242	0.0517315	0
	73.5	-0.0226564	0.052037	0
	73.75	-0.0227884	0.0523413	0
	74	-0.0229199	0.0526446	0
	74.25	-0.0230512	0.0529467	0
	74.5	-0.0231821	0.0532477	0
	74.75	-0.0233126	0.0535475	0
	75	-0.0234429	0.0538463	0
	75.25	-0.0235727	0.054144	0
	75.5	-0.0237023	0.0544407	0
	75.75	-0.0238315	0.0547362	0
	76	-0.0239603	0.0550307	0
	76.25	-0.0240888	0.0553242	0
	76.5	-0.024217	0.0556166	0
	76.75	-0.0243448	0.055908	0
	77	-0.0244723	0.0561983	0
	77.25	-0.0245994	0.0564877	0
	77.5	-0.0247262	0.056776	0
	77.75	-0.0248527	0.0570634	0
	78	-0.0249788	0.0573497	0
	78.25	-0.0251045	0.0576351	0
	78.5	-0.0252299	0.0579195	0
	78.75	-0.025355	0.058203	0
	79	-0.0254797	0.0584855	0
	79.25	-0.0256041	0.058767	0
	79.5	-0.0257282	0.0590476	0
	79.75	-0.0258519	0.0593273	0
	80	-0.0259752	0.059606	0
	80.25	-0.0260983	0.0598838	0
	80.5	-0.026221	0.0601608	0
	80.75	-0.0263433	0.0604368	0
	81	-0.0264653	0.0607119	0
	81.25	-0.026587	0.0609861	0
	81.5	-0.0267084	0.0612594	0
	81.75	-0.0268294	0.0615319	0
	82	-0.0269501	0.0618034	0
	82.25	-0.0270704	0.0620741	0
	82.5	-0.0271905	0.062344	0
	82.75	-0.0273102	0.062613	0
	83	-0.0274295	0.0628812	0
	83.25	-0.0275486	0.0631485	0
	83.5	-0.0276673	0.063415	0
	83.75	-0.0277857	0.0636806	0
	84	-0.0279037	0.0639454	0
	84.25	-0.0280215	0.0642095	0
	84.5	-0.0281389	0.0644727	0
	84.75	-0.028256	0.064735	0
	85	-0.0283727	0.0649966	0
	85.25	-0.0284892	0.0652574	0
	85.5	-0.0286053	0.0655175	0
	85.75	-0.0287212	0.0657767	0
	86	-0.0288367	0.0660351	0
	86.25	-0.0289519	0.0662928	0
	86.5	-0.0290667	0.0665497	0
	86.75	-0.0291813	0.0668059	0
	87	-0.0292955	0.0670613	0
	87.25	-0.0294094	0.067316	0
	87.5	-0.029523	0.0675699	0
	87.75	-0.0296363	0.0678232	0
	88	-0.0297492	0.0680756	0
	88.25	-0.0298619	0.0683274	0
	88.5	-0.0299742	0.0685785	0
	88.75	-0.0300862	0.0688288	0
	89	-0.0301979	0.0690785	0

## Sheet: FEF 25-75%_females
Lookup tables
	age	Mspline	Sspline	Lspline		Coefficients to be used with lookup tables for Mspline, Sspline and Lspline (4-88 years)
	4	-0.0181337305779348	-0.168761926537435	1.16573417585641e-15		Coefficients
	4.25	-0.025938245000436	-0.113411584074832	1.16573417585641e-15		Intercept	a0 - 8.29881	p0 -1.76754	q0 - 0.5370
	4.5	-0.0332964795237807	-0.061228526608518	1.11022302462516e-15		Height	a1 1.81143	/
	4.75	-0.0402454569414736	-0.0123867226293739	1.11022302462516e-15		Age	a2 0.08834	p1 0.18735	q1 0.3180
	5	-0.046795005929587	0.0319805832287319	1.11022302462516e-15		Splines	Mspline	Sspline	Lspline
	5.25	-0.0529466915646175	0.0711312665445263	9.99200722162641e-16
	5.5	-0.0586415858391103	0.104393021507431	9.99200722162641e-16
	5.75	-0.0638156443779607	0.131080950455661	9.99200722162641e-16		L = q0 + q1*ln(Age) + Lspline
	6	-0.0684237099232163	0.150800437578254	9.99200722162641e-16		M = exp(a0 + a1*ln(Height) + a2*ln(Age) + Mspline)
	6.25	-0.0723968354590934	0.164048239726533	9.99200722162641e-16		S = exp(p0 + p1*ln(Age) + Sspline)
	6.5	-0.0756564826156811	0.171840253574328	8.88178419700125e-16		LLN (5th percentile) = exp(ln(1 - 1.645*L*S)/L +ln(M))
	6.75	-0.0781468833833703	0.175045702145306	8.88178419700125e-16
	7	-0.0798360462237735	0.174389179013905	8.88178419700125e-16		Age in years with > 1 decimals
	7.25	-0.0807538014469174	0.170416496413037	8.88178419700125e-16		Height in cm
	7.5	-0.080956228682826	0.163558980464528	8.88178419700125e-16
	7.75	-0.0804945560753865	0.154188793606909	7.7715611723761e-16		For 4-88 years:
	8	-0.0794154273618588	0.142628430917434	8.88178419700125e-16		Linearly interpolate Mspline , Sspline and Lspline for appropriate age (e.g. 4.3 yr) from look-up tables
	8.25	-0.0777640703426599	0.129138289028211	8.88178419700125e-16
	8.5	-0.0755868202695851	0.11390727182868	7.7715611723761e-16
	8.75	-0.0729260579645317	0.0970988640178641	8.88178419700125e-16
	9	-0.0698200457733176	0.078859220287844	8.88178419700125e-16
	9.25	-0.0663034100111037	0.0593192941020666	7.7715611723761e-16
	9.5	-0.0624138395988645	0.0386582916252629	7.7715611723761e-16
	9.75	-0.0582087714047113	0.0172653817829318	7.7715611723761e-16
	10	-0.0537443278050969	-0.00446861466423298	7.7715611723761e-16
	10.25	-0.0490697933063871	-0.0262068982685948	7.7715611723761e-16
	10.5	-0.0442285038634633	-0.0476592785838914	6.66133814775094e-16
	10.75	-0.0392586037115841	-0.068575892043703	7.7715611723761e-16
	11	-0.0341932605192561	-0.0887551084087435	6.66133814775094e-16
	11.25	-0.0290596052725753	-0.108088386934737	6.66133814775094e-16
	11.5	-0.0238809464296157	-0.126503496608404	6.66133814775094e-16
	11.75	-0.0186778805536481	-0.143939997667765	7.7715611723761e-16
	12	-0.0134686101384638	-0.160347708902117	6.66133814775094e-16
	12.25	-0.00826922076734959	-0.175685375077269	5.55111512312578e-16
	12.5	-0.00309392305229927	-0.189919513703704	6.66133814775094e-16
	12.75	0.00204315844989722	-0.203017327444019	6.66133814775094e-16
	13	0.00711943768199852	-0.214913561243304	5.55111512312578e-16
	13.25	0.0121109619953668	-0.225537759319576	5.55111512312578e-16
	13.5	0.0169965524046596	-0.234830139952938	6.66133814775094e-16
	13.75	0.0217575159429266	-0.242740398495357	5.55111512312578e-16
	14	0.0263773803487268	-0.249226612005115	5.55111512312578e-16
	14.25	0.0308416590874572	-0.254254273999046	5.55111512312578e-16
	14.5	0.0351376428916659	-0.257795442581762	6.66133814775094e-16
	14.75	0.0392546366151247	-0.259831082853926	5.55111512312578e-16
	15	0.0431899095089712	-0.260395245251317	5.55111512312578e-16
	15.25	0.0469464809500266	-0.259559314196934	5.55111512312578e-16
	15.5	0.0505275396972458	-0.257391519729547	6.66133814775094e-16
	15.75	0.0539362747352623	-0.25395609083344	5.55111512312578e-16
	16	0.0571758660384027	-0.249313542680347	5.55111512312578e-16
	16.25	0.0602494765822668	-0.243520938434419	5.55111512312578e-16
	16.5	0.063160245573564	-0.236632129154878	5.55111512312578e-16
	16.75	0.0659112827406778	-0.22869797377047	5.55111512312578e-16
	17	0.0685056635249595	-0.219766542048465	5.55111512312578e-16
	17.25	0.0709459289119811	-0.209907804996747	4.44089209850063e-16
	17.5	0.073232525724948	-0.199290671943073	5.55111512312578e-16
	17.75	0.0753655200353194	-0.188098395281016	5.55111512312578e-16
	18	0.0773451766481008	-0.176499989796816	5.55111512312578e-16
	18.25	0.0791719376249862	-0.164651342908218	4.44089209850063e-16
	18.5	0.0808464029191516	-0.152696229963738	4.44089209850063e-16
	18.75	0.0823693129110046	-0.140767243275623	4.44089209850063e-16
	19	0.0837415326500457	-0.128986643041359	4.44089209850063e-16
	19.25	0.0849640376294207	-0.117467137461881	4.44089209850063e-16
	19.5	0.0860379009386003	-0.106312598596404	5.55111512312578e-16
	19.75	0.0869642816569796	-0.0956187192778593	4.44089209850063e-16
	20	0.0877444205842774	-0.0854681563925879	4.44089209850063e-16
	20.25	0.0883796713312943	-0.0758954634961821	4.44089209850063e-16
	20.5	0.0888714627646854	-0.0669130494550416	4.44089209850063e-16
	20.75	0.0892212683489086	-0.0585317619033918	4.44089209850063e-16
	21	0.089430599401422	-0.0507610892318771	4.44089209850063e-16
	21.25	0.0895009990828326	-0.0436092730587436	4.44089209850063e-16
	21.5	0.0894340369754101	-0.0370834062776026	4.44089209850063e-16
	21.75	0.0892313041884529	-0.0311895234030364	4.44089209850063e-16
	22	0.0888944089405665	-0.0259326838054057	4.44089209850063e-16
	22.25	0.0884249725740966	-0.0213170484345282	4.44089209850063e-16
	22.5	0.087824625961483	-0.0173459505855389	4.44089209850063e-16
	22.75	0.0870950062671874	-0.014021961195112	4.44089209850063e-16
	23	0.0862377540321813	-0.0113469491237796	4.44089209850063e-16
	23.25	0.0852550990427465	-0.00931594630997301	4.44089209850063e-16
	23.5	0.0841541815844407	-0.00787171776664763	2.22044604925031e-16
	23.75	0.0829442608425941	-0.00693415263782682	4.44089209850063e-16
	24	0.0816341274403154	-0.00642750659611457	2.22044604925031e-16
	24.25	0.0802321106709831	-0.0062803486259877	2.22044604925031e-16
	24.5	0.0787461042748543	-0.00642531160935045	4.44089209850063e-16
	24.75	0.0771835905981373	-0.00679885887281495	2.22044604925031e-16
	25	0.0755516632476372	-0.00734106555958713	4.44089209850063e-16
	25.25	0.0738570483473433	-0.00799541377082158	2.22044604925031e-16
	25.5	0.0721061244931045	-0.00870860050958622	2.22044604925031e-16
	25.75	0.0703049414957837	-0.00943035753404331	4.44089209850063e-16
	26	0.0684592379953246	-0.0101132822941135	2.22044604925031e-16
	26.25	0.0665744580217185	-0.0107126791943197	2.22044604925031e-16
	26.5	0.064655766574429	-0.0111864104769943	2.22044604925031e-16
	26.75	0.0627080642846378	-0.0114947560794119	4.44089209850063e-16
	27	0.0607360247569639	-0.0116015818456356	2.22044604925031e-16
	27.25	0.0587444556846242	-0.011493443463078	2.22044604925031e-16
	27.5	0.0567382145532163	-0.0111741365840923	4.44089209850063e-16
	27.75	0.0547219169225102	-0.0106478355461077	4.44089209850063e-16
	28	0.0526999404501698	-0.00991860992572002	4.44089209850063e-16
	28.25	0.050676437004519	-0.00899042783193282	4.44089209850063e-16
	28.5	0.0486553440992852	-0.00786715906197477	2.22044604925031e-16
	28.75	0.0466403956918739	-0.00655257814075716	2.22044604925031e-16
	29	0.0446351323854488	-0.00505036724997332	2.22044604925031e-16
	29.25	0.042642911070824	-0.00336411904696776	2.22044604925031e-16
	29.5	0.0406669140430278	-0.00149733938099894	2.22044604925031e-16
	29.75	0.038710157623969	0.000546550087775932	2.22044604925031e-16
	30	0.0367755003214656	0.00276420936173416	2.22044604925031e-16
	30.25	0.034865650551998	0.00515237767707544	2.22044604925031e-16
	30.5	0.0329831739521582	0.00770787115580251	4.44089209850063e-16
	30.75	0.0311305003075661	0.0104275805387508	2.22044604925031e-16
	31	0.0293099301049695	0.0133084689797549	2.22044604925031e-16
	31.25	0.0275236510142181	0.016347604008625	2.22044604925031e-16
	31.5	0.0257733026528886	0.0195406905896103	2.22044604925031e-16
	31.75	0.0240584833500472	0.0228770918867274	2.22044604925031e-16
	32	0.0223781193281978	0.0263443564812853	2.22044604925031e-16
	32.25	0.0207311787257858	0.0299305709252109	2.22044604925031e-16
	32.5	0.0191166645678083	0.0336243187490302	2.22044604925031e-16
	32.75	0.0175336126048178	0.0374146564918587	2.22044604925031e-16
	33	0.0159810900557744	0.0412910935701754	2.22044604925031e-16
	33.25	0.0144581944119677	0.0452435730663865	2.22044604925031e-16
	33.5	0.0129640522875363	0.04926245346356	2.22044604925031e-16
	33.75	0.0114978183247016	0.0533384912077557	2.22044604925031e-16
	34	0.0100586741459754	0.0574628240905091	2.22044604925031e-16
	34.25	0.00864582735168185	0.0616269554030917	2.22044604925031e-16
	34.5	0.00725851056062776	0.0658227388147627	2.22044604925031e-16
	34.75	0.00589598049197626	0.0700423639466721	2.22044604925031e-16
	35	0.00455751708689878	0.0742783426002263	2.22044604925031e-16
	35.25	0.00324242266597352	0.0785234956080816	0
	35.5	0.00195002112440168	0.0827709402798797	2.22044604925031e-16
	35.75	0.00067965712520035	0.0870140783224875	2.22044604925031e-16
	36	-0.00056930452128956	0.0912465846718542	2.22044604925031e-16
	36.25	-0.00179748108486955	0.0954623928280787	2.22044604925031e-16
	36.5	-0.00300547001851204	0.0996556906826687	2.22044604925031e-16
	36.75	-0.00419412852613821	0.103820228782126	2.22044604925031e-16
	37	-0.00536468310402505	0.107949044535593	2.22044604925031e-16
	37.25	-0.00651835484159324	0.112035370363283	0
	37.5	-0.00765631987938509	0.116072722986423	2.22044604925031e-16
	37.75	-0.0087797127102105	0.120054888318097	2.22044604925031e-16
	38	-0.00988962745593724	0.123975911609711	2.22044604925031e-16
	38.25	-0.0109871193527624	0.127830087374626	2.22044604925031e-16
	38.5	-0.0120732061749314	0.131611949740031	2.22044604925031e-16
	38.75	-0.0131488696004629	0.135316263202844	0
	39	-0.0142150565213557	0.138938013772615	0
	39.25	-0.0152726803008472	0.142472400481866	2.22044604925031e-16
	39.5	-0.0163226219804393	0.145914827238781	0
	39.75	-0.0173657314385212	0.14926089504714	0
	40	-0.0184028285027651	0.152506394488703	2.22044604925031e-16
	40.25	-0.0194347040195391	0.155647298572116	2.22044604925031e-16
	40.5	-0.0204621208794986	0.158679755830783	0
	40.75	-0.0214858150047563	0.161600083719497	0
	41	-0.0225064962963746	0.164404762267941	2.22044604925031e-16
	41.25	-0.0235248495459439	0.167090427993112	2.22044604925031e-16
	41.5	-0.0245415353116485	0.169653868051774	2.22044604925031e-16
	41.75	-0.0255571907602787	0.172092014626658	2.22044604925031e-16
	42	-0.0265724304792139	0.174401939529538	0
	42.25	-0.0275878473233835	0.176580848781272	0
	42.5	-0.0286040134331778	0.17862607668869	0
	42.75	-0.0296210748125549	0.180536515867911	0
	43	-0.0306387198363449	0.182312726365361	0
	43.25	-0.0316565755100848	0.183955533699755	0
	43.5	-0.0326742902233468	0.185465734545553	0
	43.75	-0.0336915241636504	0.186844128698689	2.22044604925031e-16
	44	-0.034707948956151	0.188091518533736	0
	44.25	-0.0357232472887876	0.18920870857993	0
	44.5	-0.0367371125530127	0.190196505112842	0
	44.75	-0.03774924849386	0.191055715776016	2.22044604925031e-16
	45	-0.0387593688760939	0.191787149216848	0
	45.25	-0.0397671971597227	0.192391614744234	2.22044604925031e-16
	45.5	-0.0407724661880744	0.192869921999789	0
	45.75	-0.0417749178864897	0.193222880652312	2.22044604925031e-16
	46	-0.0427743029717131	0.19345130010348	0
	46.25	-0.043770380671118	0.193555989208758	0
	46.5	-0.0447629184526637	0.193537756019214	0
	46.75	-0.0457516917627361	0.193397407529548	2.22044604925031e-16
	47	-0.0467364837741275	0.193135749443167	0
	47.25	-0.0477170851421578	0.192753585952887	2.22044604925031e-16
	47.5	-0.0486932937695759	0.19225171952619	2.22044604925031e-16
	47.75	-0.0496649145780053	0.191630950712173	0
	48	-0.0506317592917815	0.190892077944883	0
	48.25	-0.0515936462223276	0.19003589737642	2.22044604925031e-16
	48.5	-0.0525504000607988	0.189063202708813	2.22044604925031e-16
	48.75	-0.0535018516867662	0.187974785028231	0
	49	-0.0544478379713187	0.186771432663026	0
	49.25	-0.0553882015849307	0.185453930985302	0
	49.5	-0.0563227883624631	0.184023046258873	0
	49.75	-0.0572513872171827	0.182479134608247	2.22044604925031e-16
	50	-0.0581737281576657	0.180822130055691	0
	50.25	-0.0590895472013262	0.179051969003815	0
	50.5	-0.0599985891284902	0.177168609129935	2.22044604925031e-16
	50.75	-0.0609006072746112	0.175172028909495	0
	51	-0.061795363272334	0.173062226816202	0
	51.25	-0.062682626805227	0.170839220579638	2.22044604925031e-16
	51.5	-0.0635621753739075	0.168503046405542	0
	51.75	-0.064433794060351	0.166053758309798	0
	52	-0.0652972753070147	0.163491427414155	0
	52.25	-0.0661524187007325	0.160816141287041	0
	52.5	-0.0669990307614627	0.158028003315042	0
	52.75	-0.0678369247421733	0.15512713207657	0
	53	-0.0686659204299493	0.152113660754389	0
	53.25	-0.069485843956322	0.148987736566938	0
	53.5	-0.0702965276133858	0.145749520206697	0
	53.75	-0.0710978096716515	0.142399185316809	0
	54	-0.0718895342133887	0.138936917965049	0
	54.25	-0.0726715509566223	0.135362916158146	0
	54.5	-0.0734437150979561	0.131677389349796	0
	54.75	-0.07420588715169	0.127880557997446	0
	55	-0.0749579327984193	0.12397265308329	0
	55.25	-0.0756997227351928	0.119953915712073	0
	55.5	-0.0764311325317353	0.115824596677353	0
	55.75	-0.0771520424922816	0.111584956069863	0
	56	-0.0778623375169376	0.107235262875095	0
	56.25	-0.0785619069731052	0.102775794606767	0
	56.5	-0.0792506445672227	0.0982068369482154	0
	56.75	-0.0799284482189888	0.0935286833779886	-2.22044604925031e-16
	57	-0.0805952199448692	0.0887416348702067	0
	57.25	-0.0812508657428213	0.0838459995730736	0
	57.5	-0.081895289156761	0.0788420351056777	0
	57.75	-0.0825284542844376	0.0737305211863515	0
	58	-0.0831504701585573	0.0685135262567461	0
	58.25	-0.0837614731867369	0.0631933410040599	-2.22044604925031e-16
	58.5	-0.084361615485804	0.0577723731183151	0
	58.75	-0.0849510406725598	0.0522529281548194	0
	59	-0.0855298900466792	0.0466372662619911	0
	59.25	-0.0860983026250466	0.0409276030742125	0
	59.5	-0.0866564151833389	0.0351261106668588	0
	59.75	-0.0872043623033285	0.0292349185371754	0
	60	-0.0877422764183349	0.0232561145528409	0
	60.25	-0.0882702878520032	0.0171917458584798	-2.22044604925031e-16
	60.5	-0.0887885248609459	0.011043819743928	-2.22044604925031e-16
	60.75	-0.0892971136747791	0.00481430452006348	0
	61	-0.0897961785352361	-0.00149486963936329	0
	61.25	-0.0902858417342971	-0.00788180987769671	0
	61.5	-0.0907662236517082	-0.0143446598531352	0
	61.75	-0.0912374427917184	-0.0208815989574165	0
	62	-0.0916996158184773	-0.0274908415527249	-2.22044604925031e-16
	62.25	-0.0921528575911266	-0.0341706362281156	0
	62.5	-0.0925972811979703	-0.0409192650736883	0
	62.75	-0.0930329979898108	-0.0477350429723961	0
	63	-0.0934601176125405	-0.0546163169091707	-2.22044604925031e-16
	63.25	-0.0938787480391614	-0.0615614652976826	0
	63.5	-0.0942889956004853	-0.0685688973176938	0
	63.75	-0.0946909650161327	-0.0756370522776164	0
	64	-0.0950847594243287	-0.0827643989852681	0
	64.25	-0.0954704804108255	-0.0899494351352079	0
	64.5	-0.0958482280374042	-0.0971906867114136	-2.22044604925031e-16
	64.75	-0.0962181008695451	-0.104486707404028	-2.22044604925031e-16
	65	-0.0965801960043677	-0.111836078040187	0
	65.25	-0.0969346090979579	-0.119237406008714	0
	65.5	-0.0972814049458979	-0.126689659858018	-2.22044604925031e-16
	65.75	-0.0976206611408728	-0.134191672122166	0
	66	-0.0979524918707604	-0.141741868343966	0
	66.25	-0.0982770094748275	-0.149338704323605	0
	66.5	-0.0985943244765251	-0.156980665522878	0
	66.75	-0.0989045456178168	-0.164666266457768	-2.22044604925031e-16
	67	-0.0992077798927387	-0.172394050105088	0
	67.25	-0.0995041325802282	-0.180162587322808	0
	67.5	-0.0997937072762243	-0.187970476283701	0
	67.75	-0.100076605925076	-0.195816341921979	0
	68	-0.100352929656602	-0.203698826215504	-2.22044604925031e-16
	68.25	-0.100622845823445	-0.211615825071282	-2.22044604925031e-16
	68.5	-0.10088653917159	-0.219565043867633	-2.22044604925031e-16
	68.75	-0.101144145890904	-0.227544747780304	0
	69	-0.101395801904387	-0.235553212110165	0
	69.25	-0.101641640734261	-0.243588746367248	-2.22044604925031e-16
	69.5	-0.101881793551172	-0.251649693542315	0
	69.75	-0.102116389224515	-0.259734429366159	0
	70	-0.102345554360463	-0.267841361730055	-2.22044604925031e-16
	70.25	-0.102569413343805	-0.27596893006869	0
	70.5	-0.102788088376586	-0.284115604767323	0
	70.75	-0.103001699524417	-0.292279886463869	0
	71	-0.103210364757922	-0.300460305474811	-2.22044604925031e-16
	71.25	-0.103414199990554	-0.308655421189408	-2.22044604925031e-16
	71.5	-0.103613319119735	-0.316863821493712	-2.22044604925031e-16
	71.75	-0.10380783406226	-0.325084122218059	-2.22044604925031e-16
	72	-0.103997854793572	-0.333314966569751	0
	72.25	-0.104183489383824	-0.341555024595499	-2.22044604925031e-16
	72.5	-0.104364844033531	-0.34980299265235	-2.22044604925031e-16
	72.75	-0.104542023108543	-0.358057592889762	-2.22044604925031e-16
	73	-0.104715129174288	-0.366317572742966	-2.22044604925031e-16
	73.25	-0.104884263029281	-0.374581704437349	0
	73.5	-0.105049523737929	-0.38284878450356	0
	73.75	-0.105211008662642	-0.391117633303126	-2.22044604925031e-16
	74	-0.105368813495284	-0.399387094564261	0
	74.25	-0.105523032287945	-0.407656034927724	0
	74.5	-0.105673757483043	-0.415923343502597	-2.22044604925031e-16
	74.75	-0.105821079942877	-0.424187931431154	0
	75	-0.105965088978548	-0.432448731463078	-2.22044604925031e-16
	75.25	-0.106105872378265	-0.440704697538812	-2.22044604925031e-16
	75.5	-0.106243516435178	-0.448954804381227	0
	75.75	-0.106378105974494	-0.457198047096692	-2.22044604925031e-16
	76	-0.106509724379984	-0.465433440784789	0
	76.25	-0.106638453620024	-0.473660020134937	0
	76.5	-0.106764374339191	-0.481876836095578	-2.22044604925031e-16
	76.75	-0.106887565700593	-0.490082963743858	0
	77	-0.107008105448549	-0.498277500313726	0
	77.25	-0.107126070172987	-0.506459553806402	-2.22044604925031e-16
	77.5	-0.107241537811523	-0.514628129503719	-2.22044604925031e-16
	77.75	-0.107354580378562	-0.522782462525156	-2.22044604925031e-16
	78	-0.107465266339825	-0.53092191017797	-2.22044604925031e-16
	78.25	-0.107573663017772	-0.539045842860624	-2.22044604925031e-16
	78.5	-0.107679834533228	-0.547153738638601	-2.22044604925031e-16
	78.75	-0.107783836874934	-0.555245408831462	-2.22044604925031e-16
	79	-0.107885723619924	-0.563320737695961	-2.22044604925031e-16
	79.25	-0.107985547478934	-0.571379612558394	-2.22044604925031e-16
	79.5	-0.108083360311383	-0.579421923753595	-2.22044604925031e-16
	79.75	-0.108179213140039	-0.587447564565209	-2.22044604925031e-16
	80	-0.108273156166804	-0.595456431111131	0
	80.25	-0.108365239664301	-0.603448382309526	-2.22044604925031e-16
	80.5	-0.108455514722776	-0.611423260769216	-2.22044604925031e-16
	80.75	-0.108544028297822	-0.619380948312001	0
	81	-0.108630824711667	-0.62732133557634	0
	81.25	-0.108715964964362	-0.635244264490142	-2.22044604925031e-16
	81.5	-0.108799535287818	-0.643149502788712	-2.22044604925031e-16
	81.75	-0.108881574075326	-0.651036961051814	-2.22044604925031e-16
	82	-0.108962114165234	-0.658906567131575	-2.22044604925031e-16
	82.25	-0.109041187893753	-0.666758251126634	-2.22044604925031e-16
	82.5	-0.109118827103257	-0.674591945337492	0
	82.75	-0.109195063150407	-0.682407584222751	-2.22044604925031e-16
	83	-0.109269926914157	-0.690205104356254	-2.22044604925031e-16
	83.25	-0.109343448803579	-0.697984444385101	-2.22044604925031e-16
	83.5	-0.109415658765557	-0.705745544988522	-2.22044604925031e-16
	83.75	-0.109486586292344	-0.713488348837563	-2.22044604925031e-16
	84	-0.109556260428961	-0.721212800555617	-2.22044604925031e-16
	84.25	-0.109624709780486	-0.728918846679722	-2.22044604925031e-16
	84.5	-0.109691962519177	-0.736606435622668	-2.22044604925031e-16
	84.75	-0.109758046391492	-0.744275517635842	-2.22044604925031e-16
	85	-0.109822988724968	-0.751926044772836	-2.22044604925031e-16
	85.25	-0.109886816438806	-0.759557970842398	-2.22044604925031e-16
	85.5	-0.109949568693988	-0.767171213842141	-2.22044604925031e-16
	85.75	-0.110011324675554	-0.774765573473812	-2.22044604925031e-16
	86	-0.110072170398472	-0.782340829663195	-2.22044604925031e-16
	86.25	-0.110132190438336	-0.789896767092774	-2.22044604925031e-16
	86.5	-0.110191467955306	-0.797433175116664	-2.22044604925031e-16
	86.75	-0.110250084717623	-0.804949847677201	-2.22044604925031e-16
	87	-0.11030812112468	-0.812446583223095	-2.22044604925031e-16
	87.25	-0.11036565622969	-0.819923184629131	-2.22044604925031e-16
	87.5	-0.110422767761913	-0.827379459117405	-2.22044604925031e-16
	87.75	-0.110479532148497	-0.834815218180024	-2.22044604925031e-16
	88	-0.110536024535924	-0.842230277503295	-2.22044604925031e-16
	88.25	-0.110592317538158	-0.84962446213027	-2.22044604925031e-16
	88.5	-0.110648449560511	-0.856997736796309	-2.22044604925031e-16
	88.75	-0.110704423241265	-0.864350212352452	-2.22044604925031e-16
	89	-0.110760239471233	-0.871682005812205	-2.22044604925031e-16
